# Supplementary material for: CXCR2 expression during melanoma tumorigenesis controls transcriptional programs that facilitate tumor growth
Source: PubMed Central journal article supplement (PMC10239119; doi:10.1186/s12943-023-01789-9), 2023-06-03
Supplement: 12943_2023_1789_MOESM1_ESM.pdf [file 12943_2023_1789_MOESM1_ESM.pdf]

Figure S1.

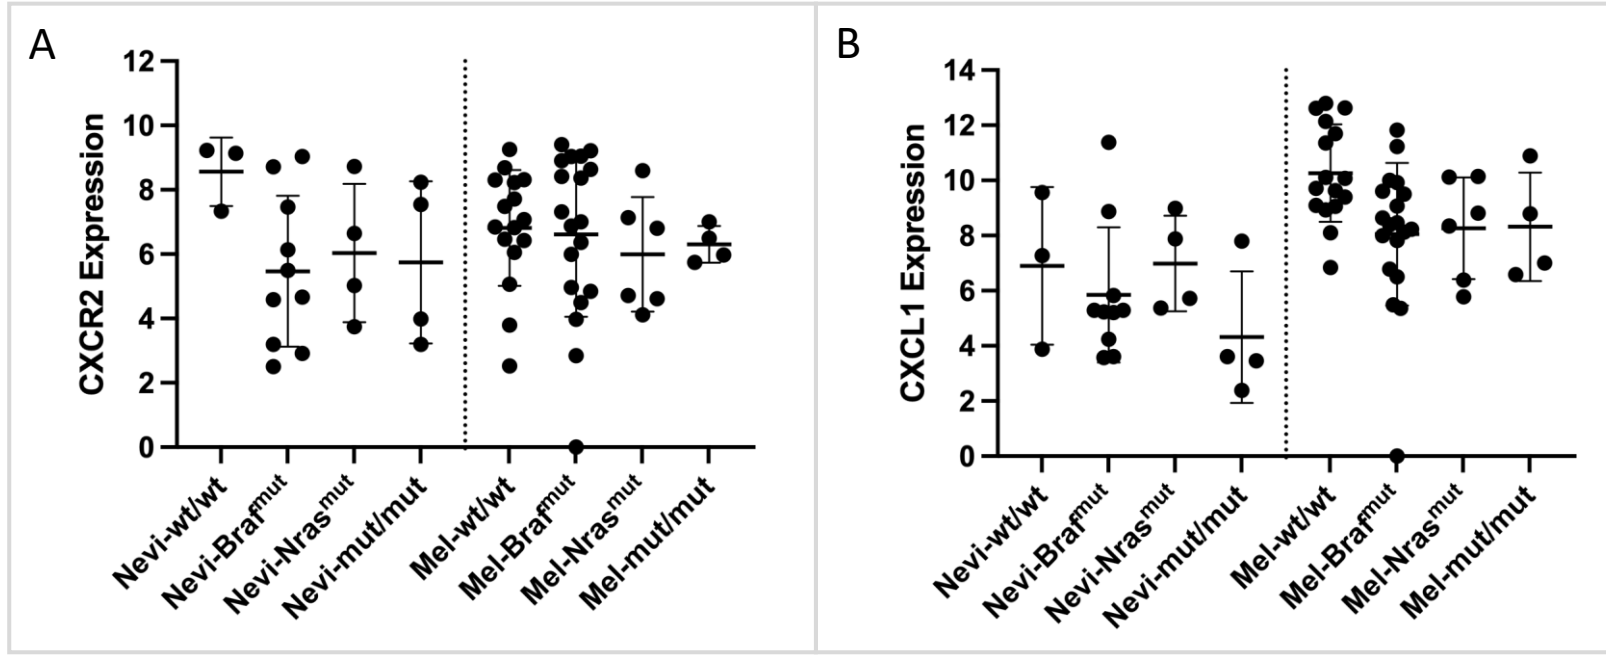

Figure S2.

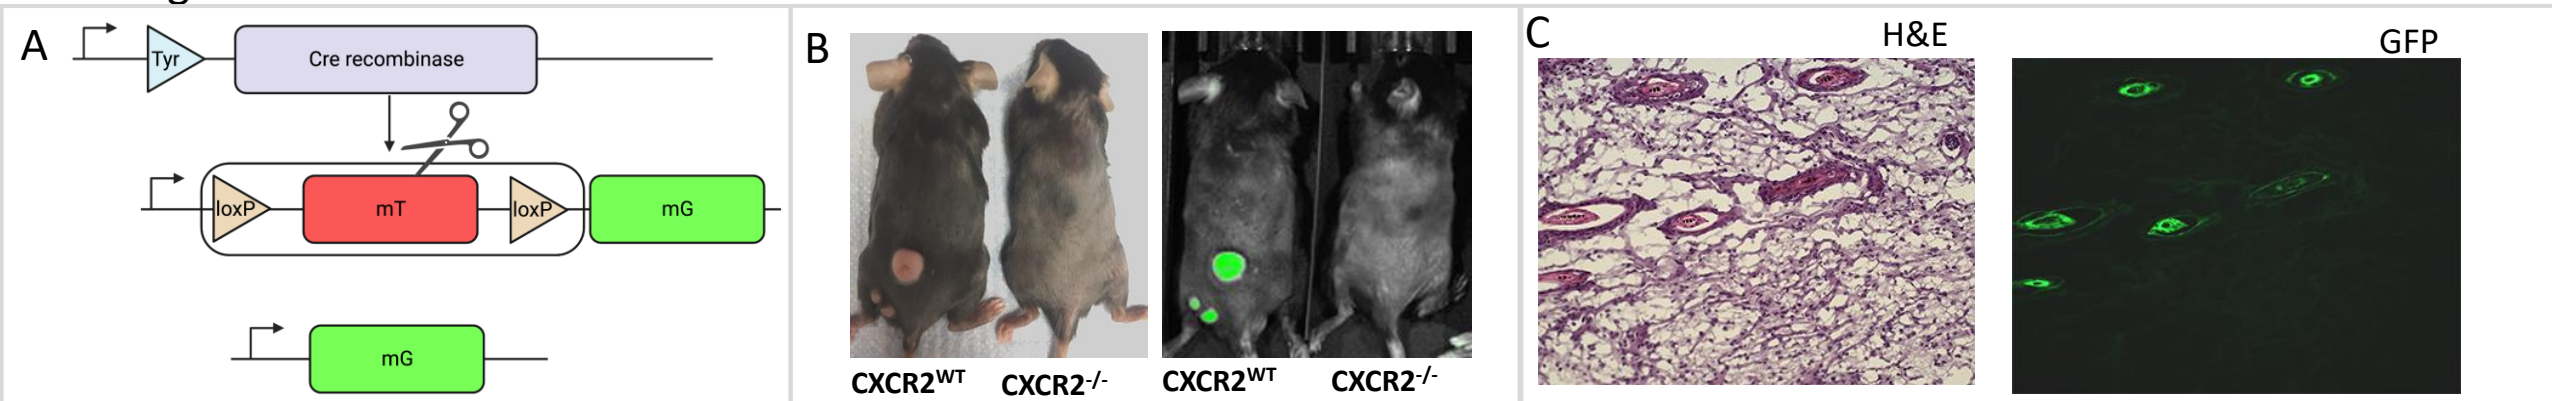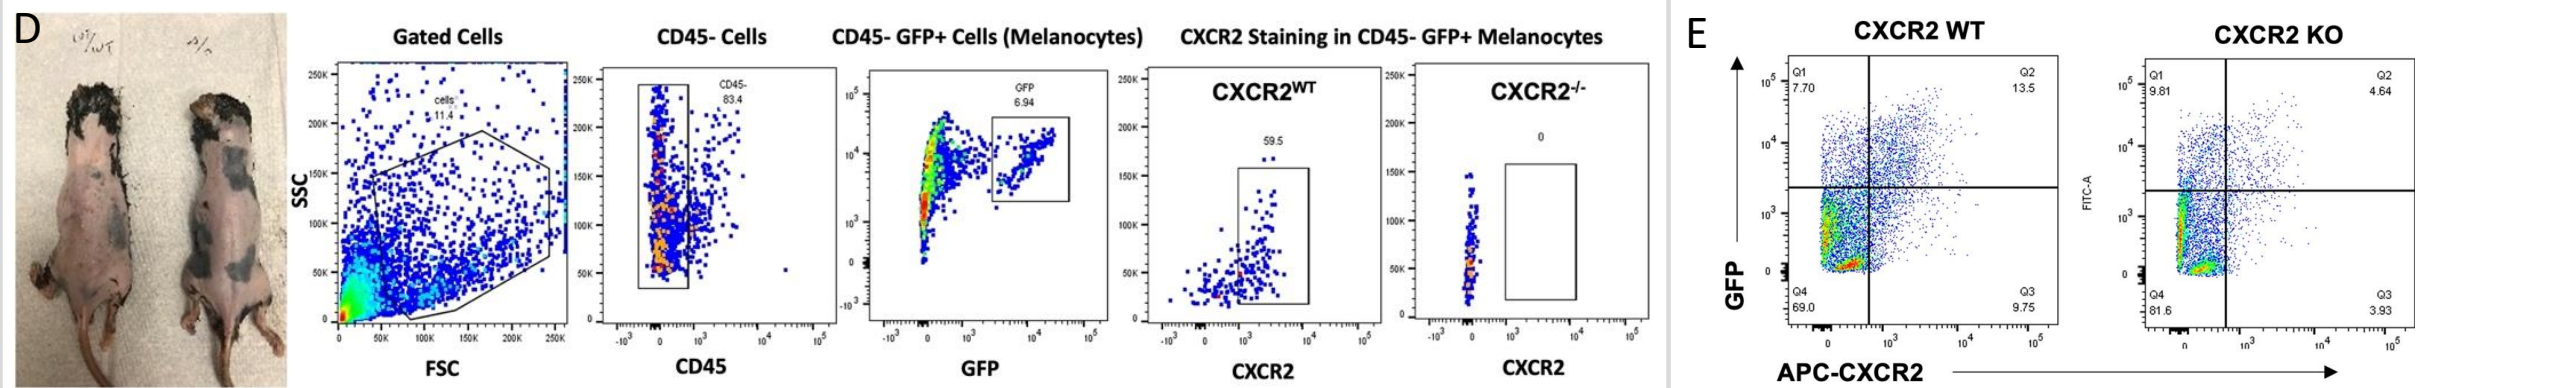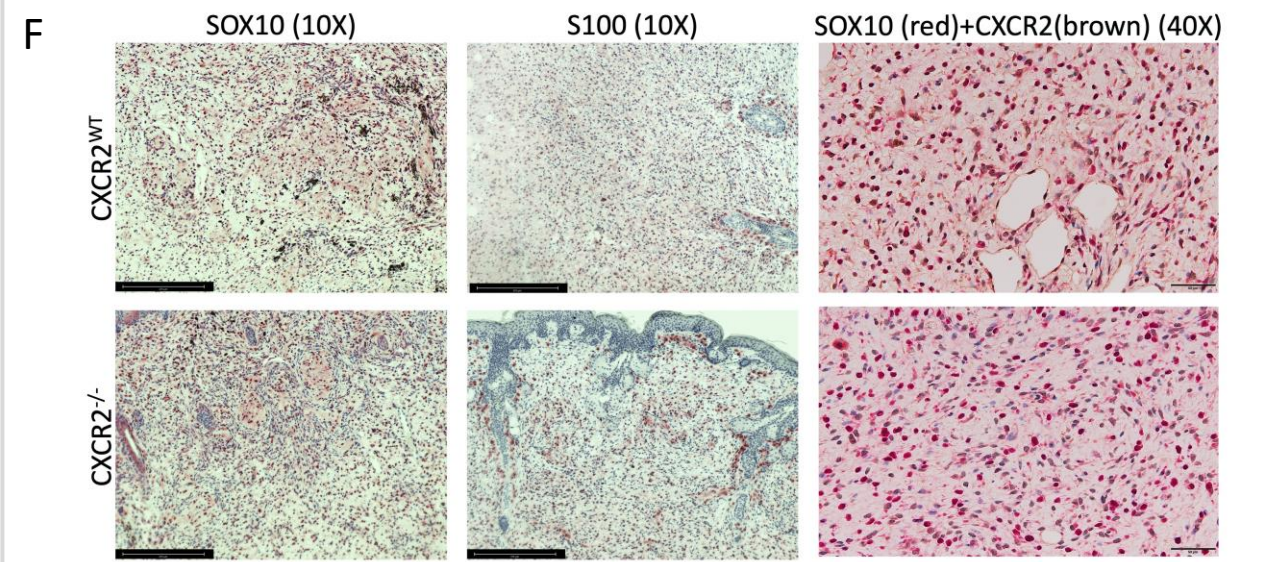

Figure S3

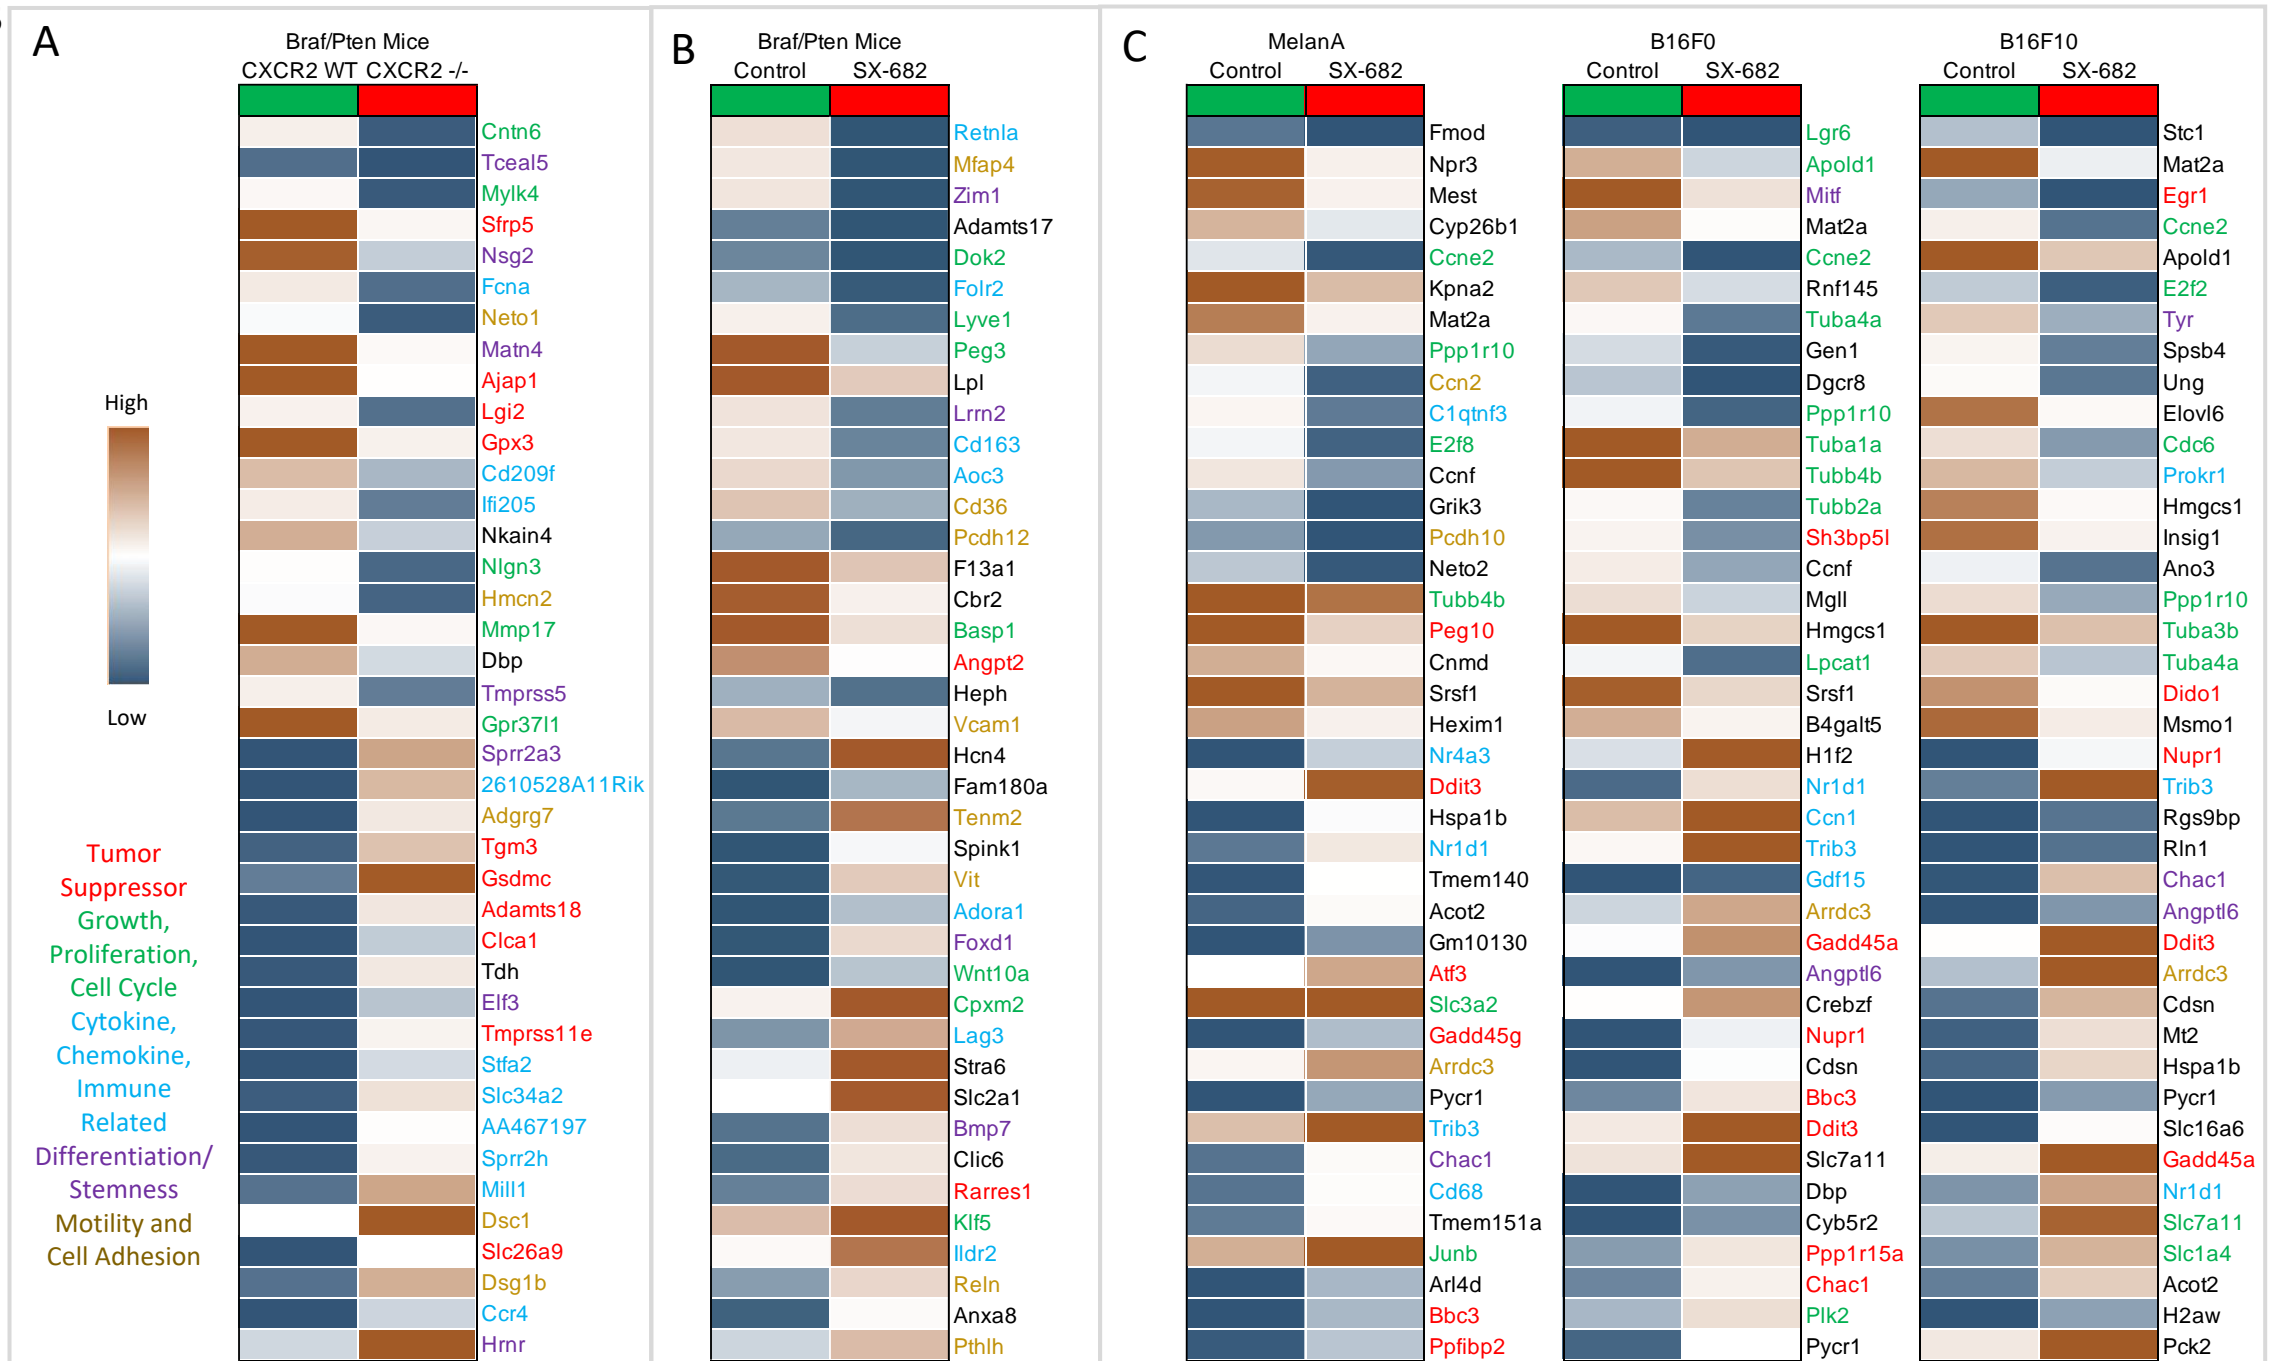

Figure S4.

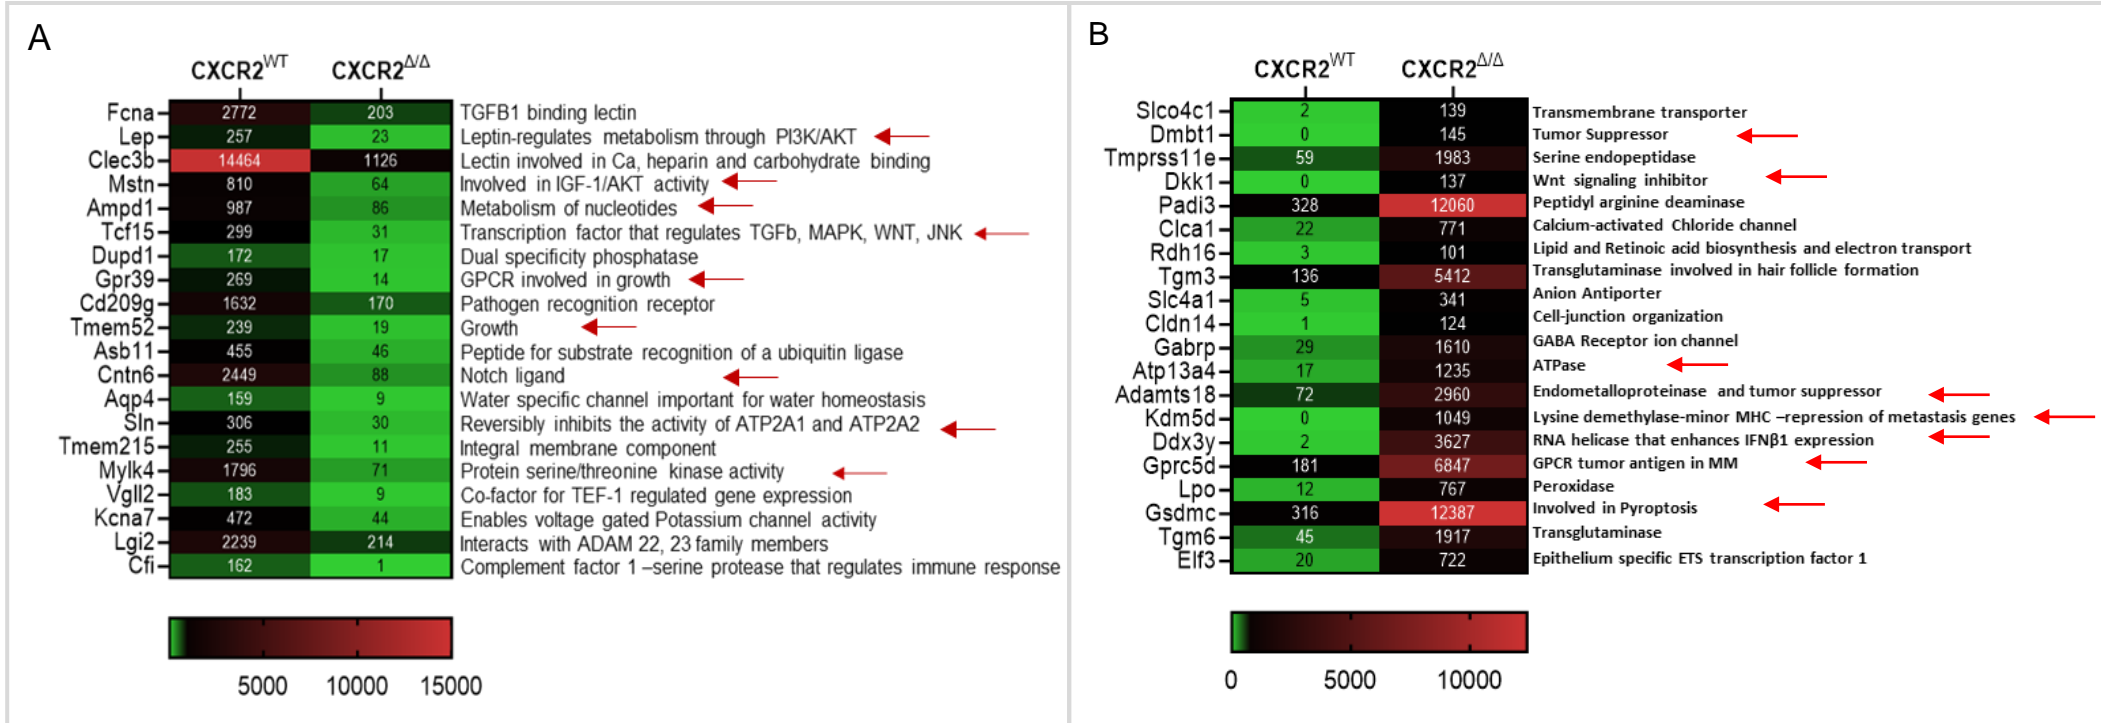

Figure S5.

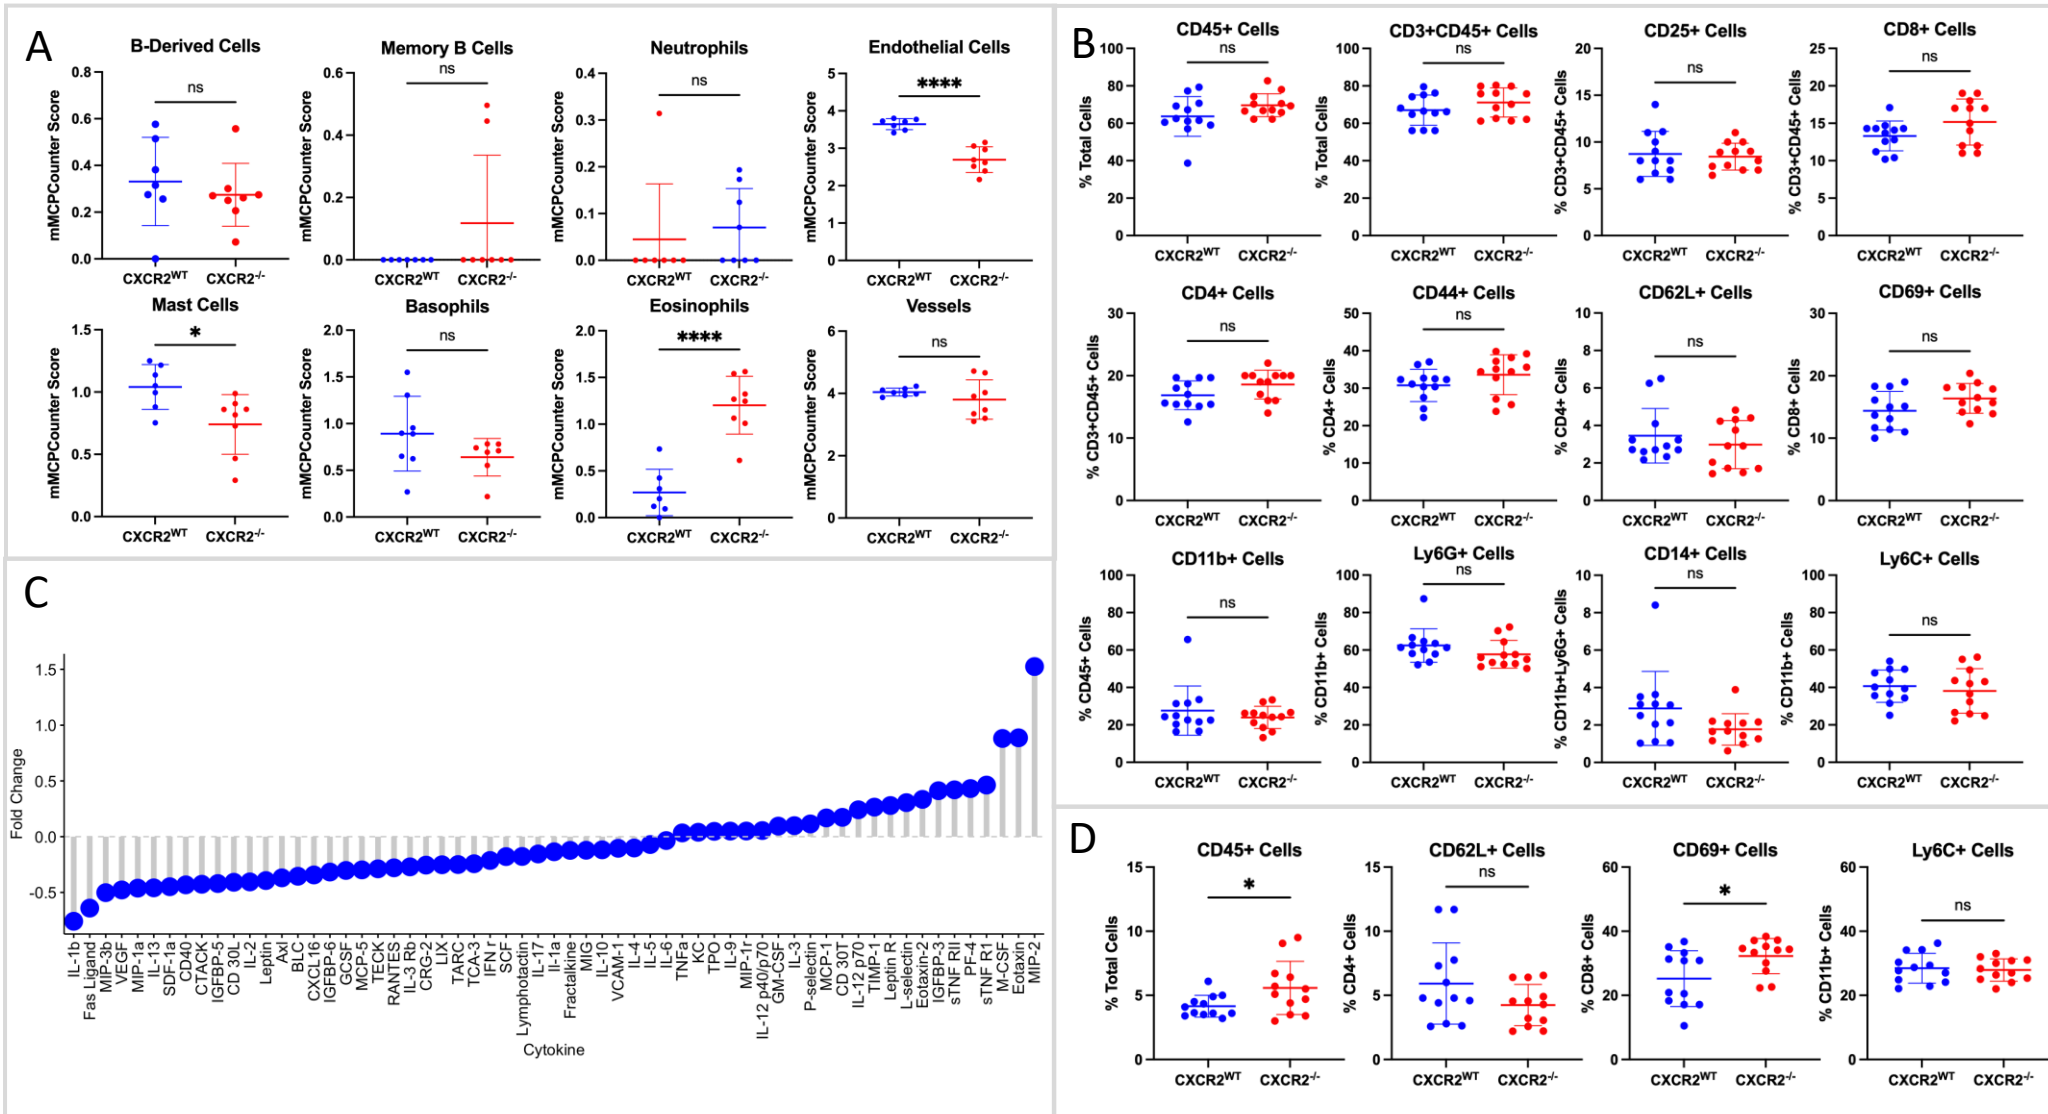

Figure S6.

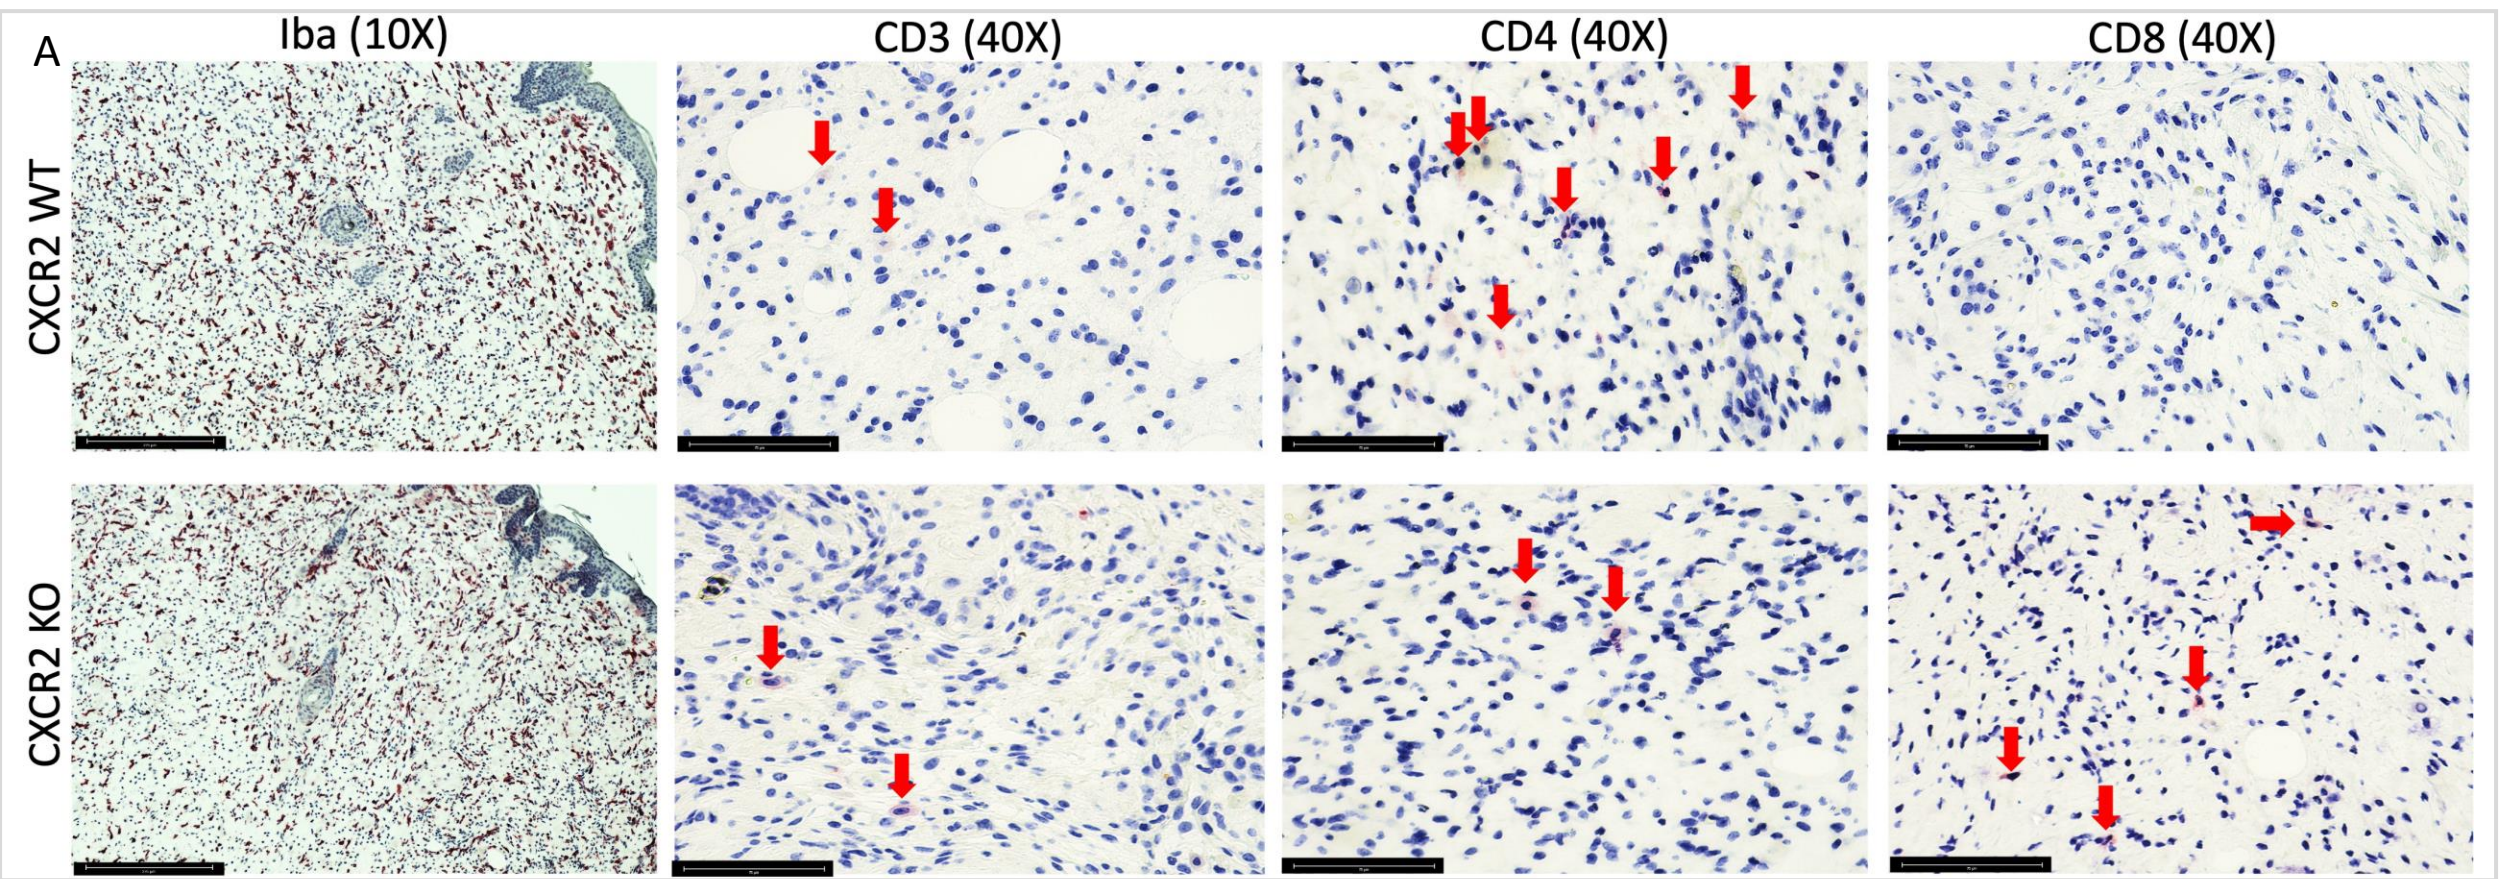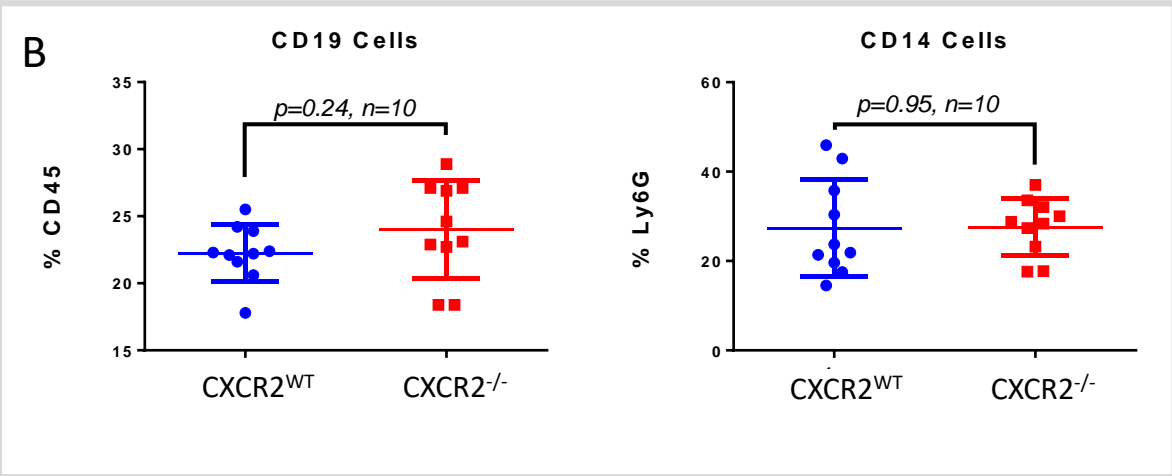

Figure S7.

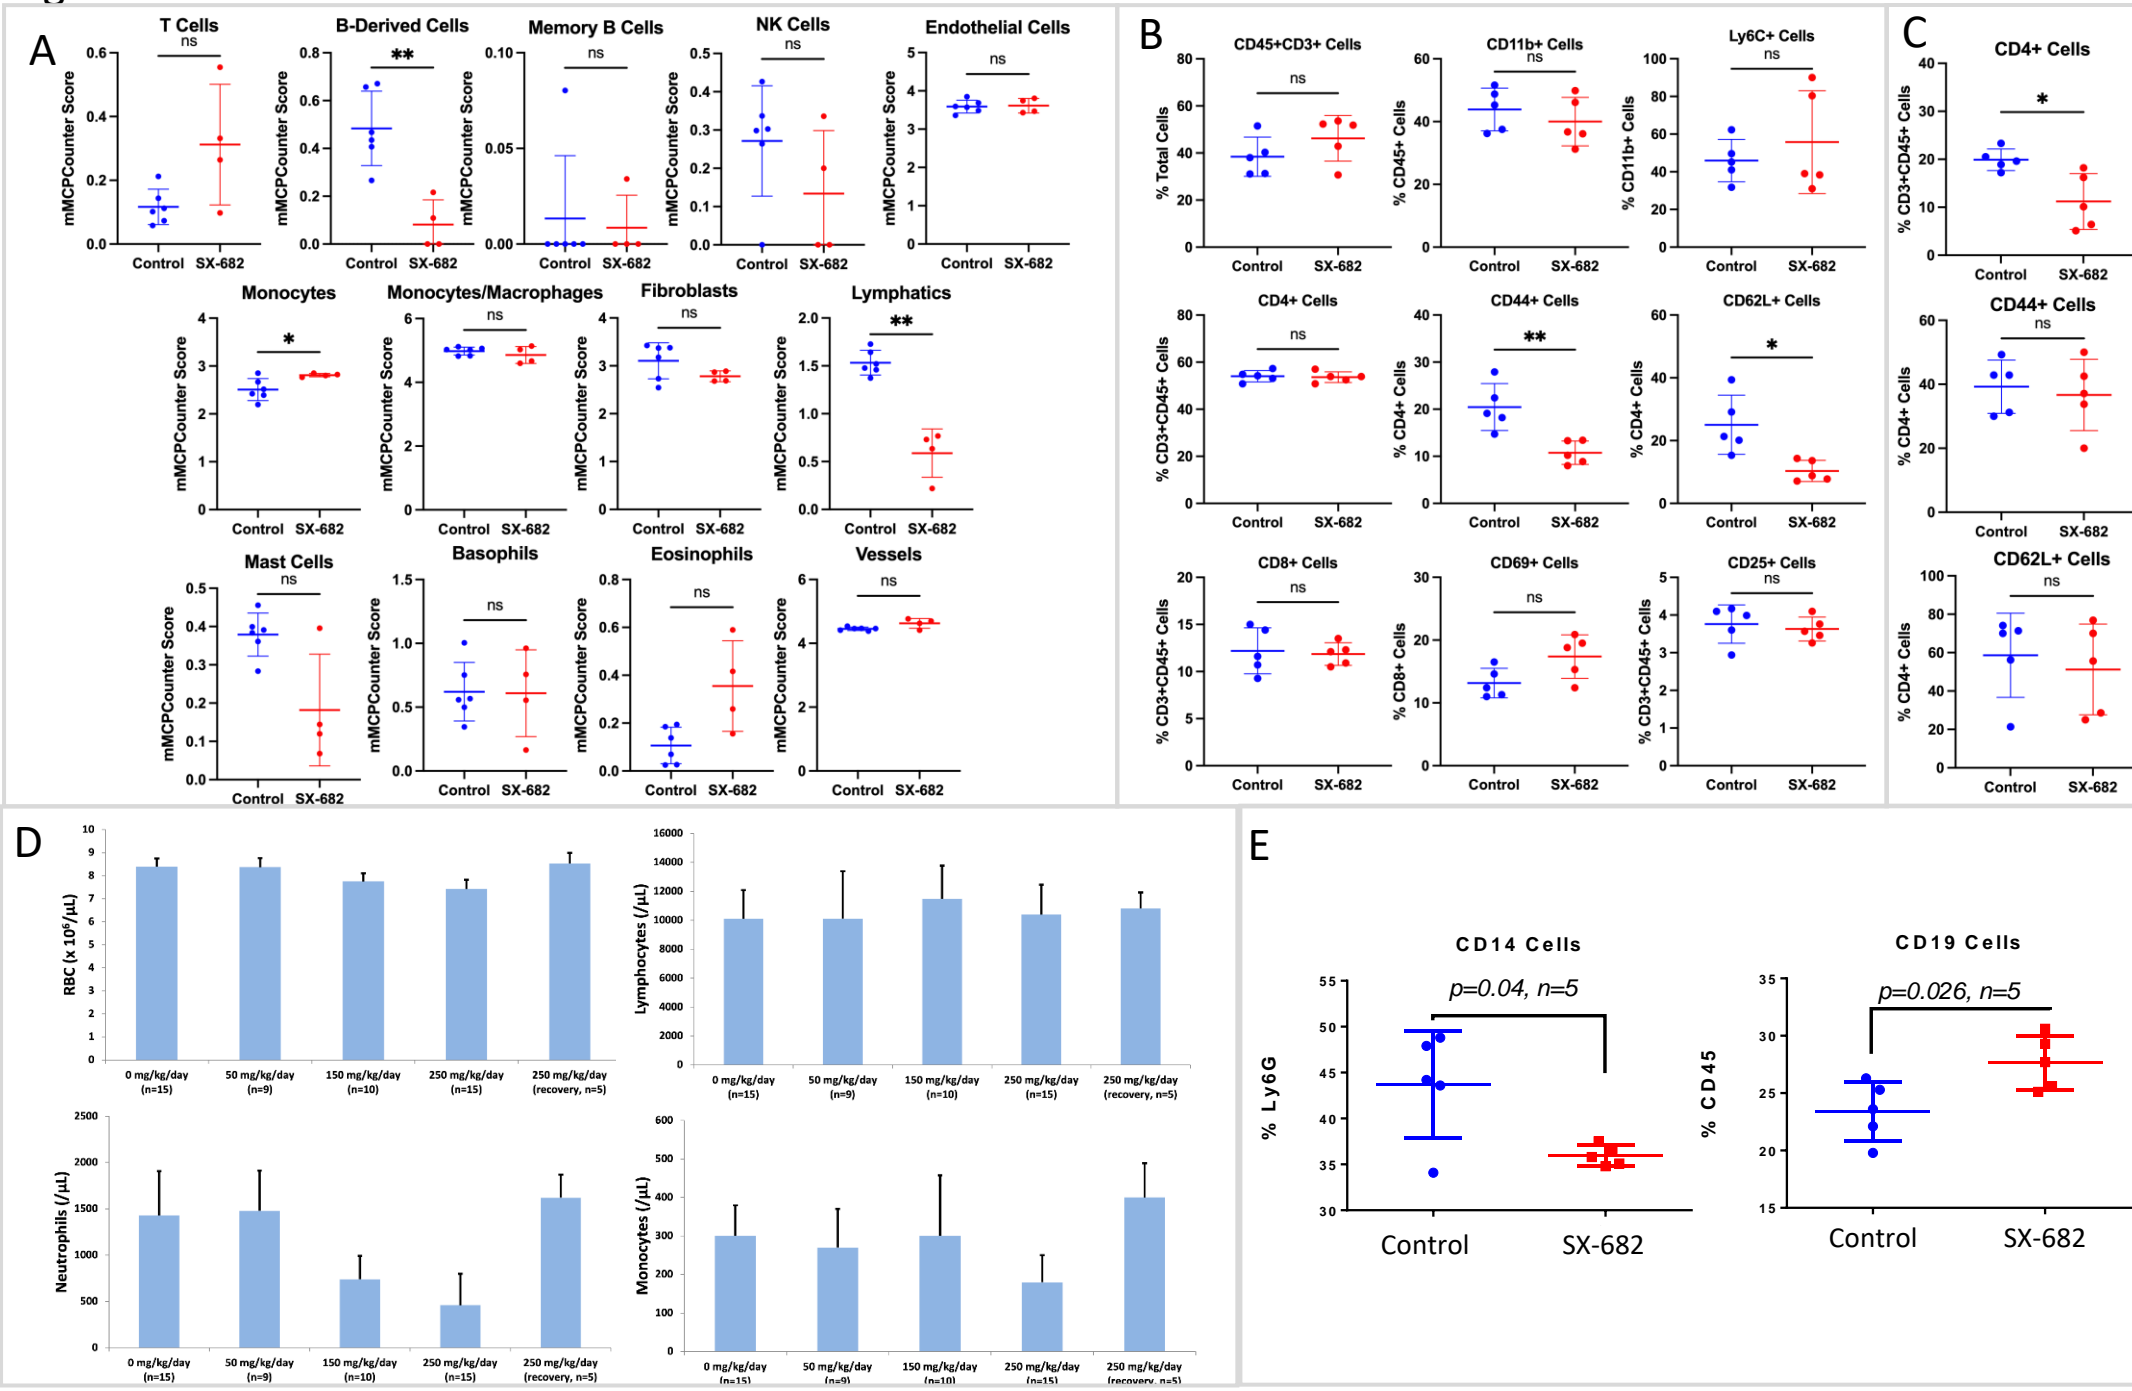

Figure S8.

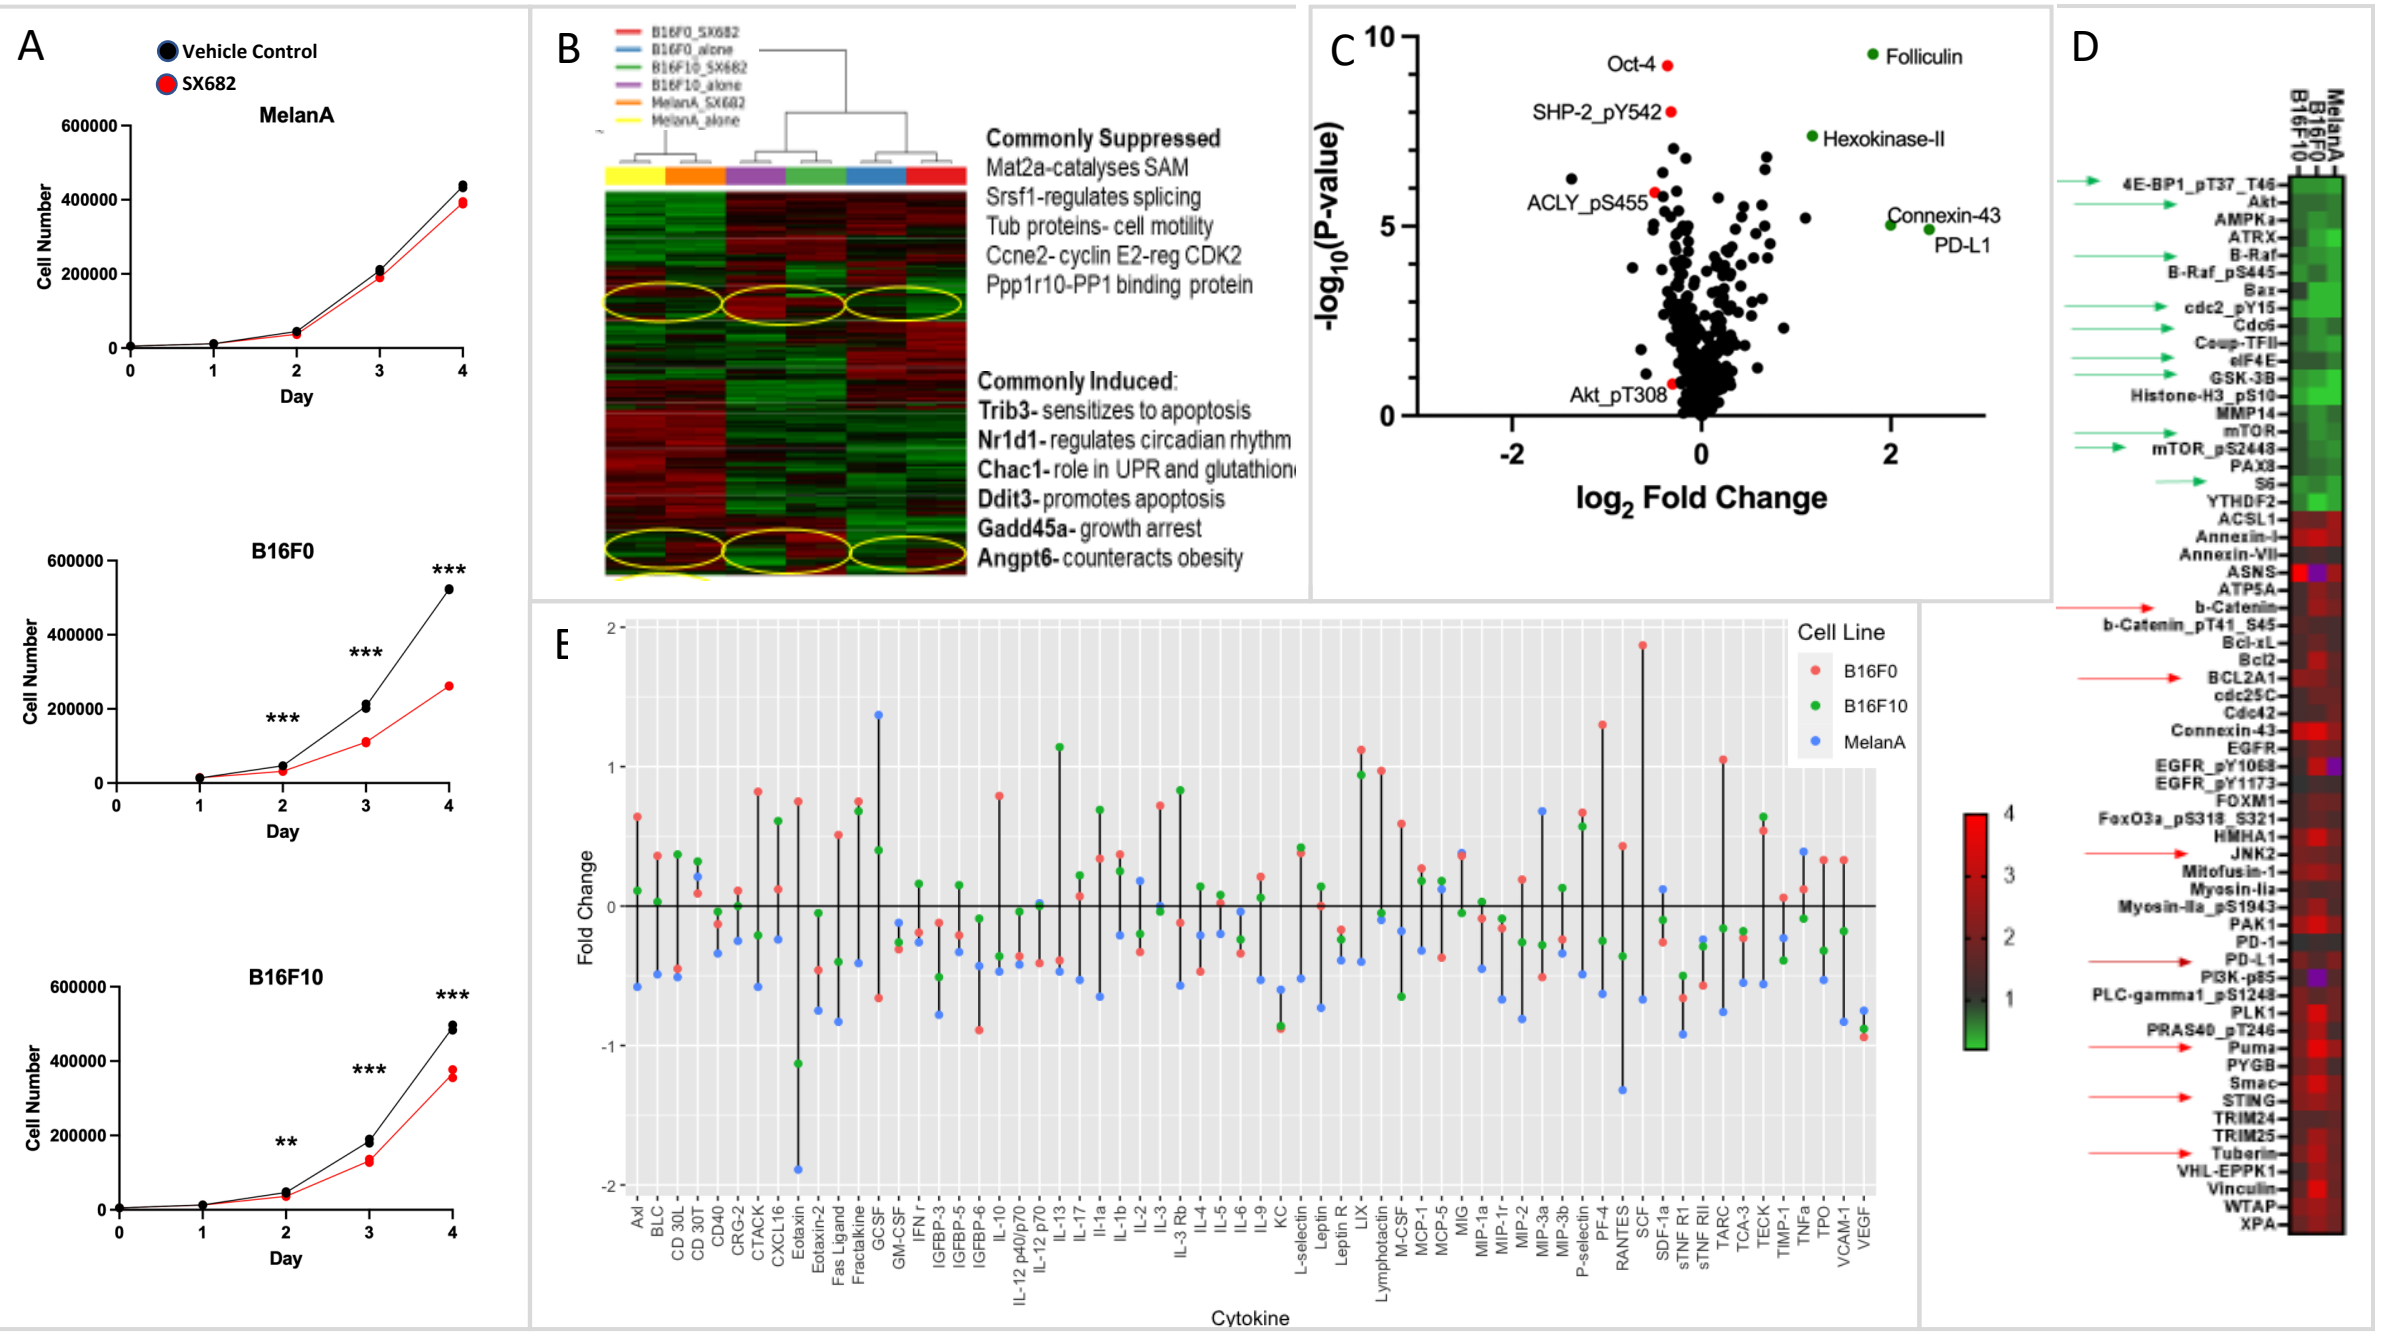



Figure S9.

A

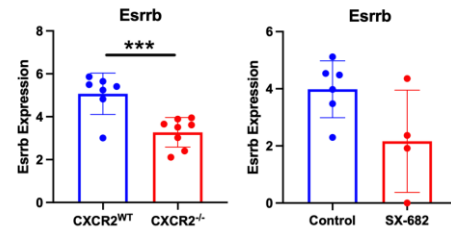

B

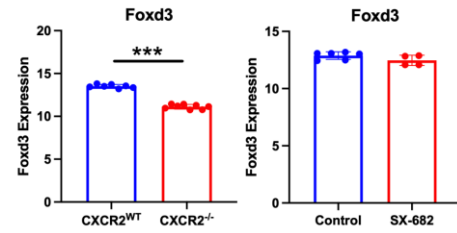

C

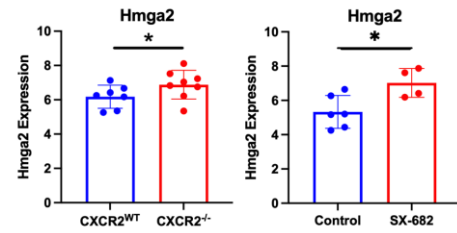

D

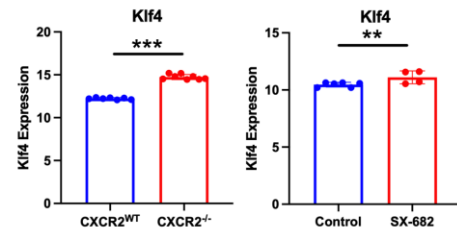

E

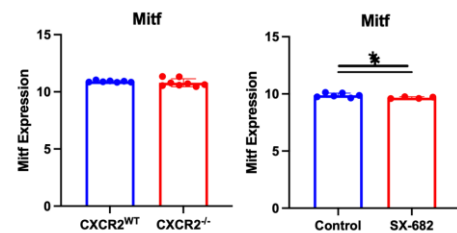

F

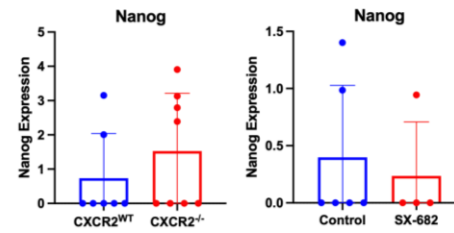

G

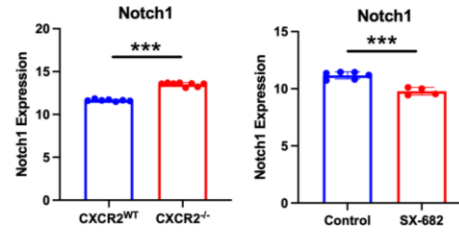

H

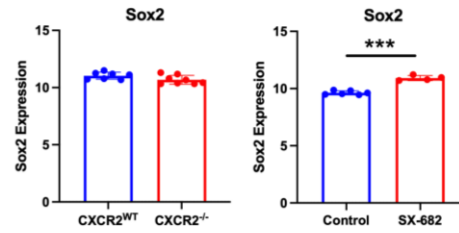

I

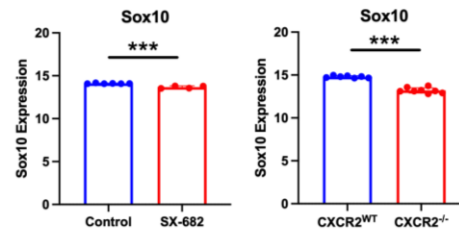

J

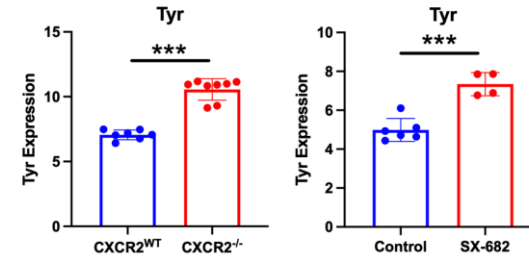

K

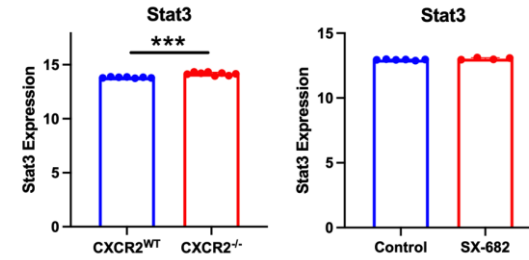

L

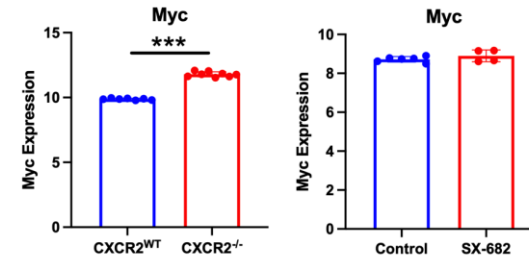

Figure S10

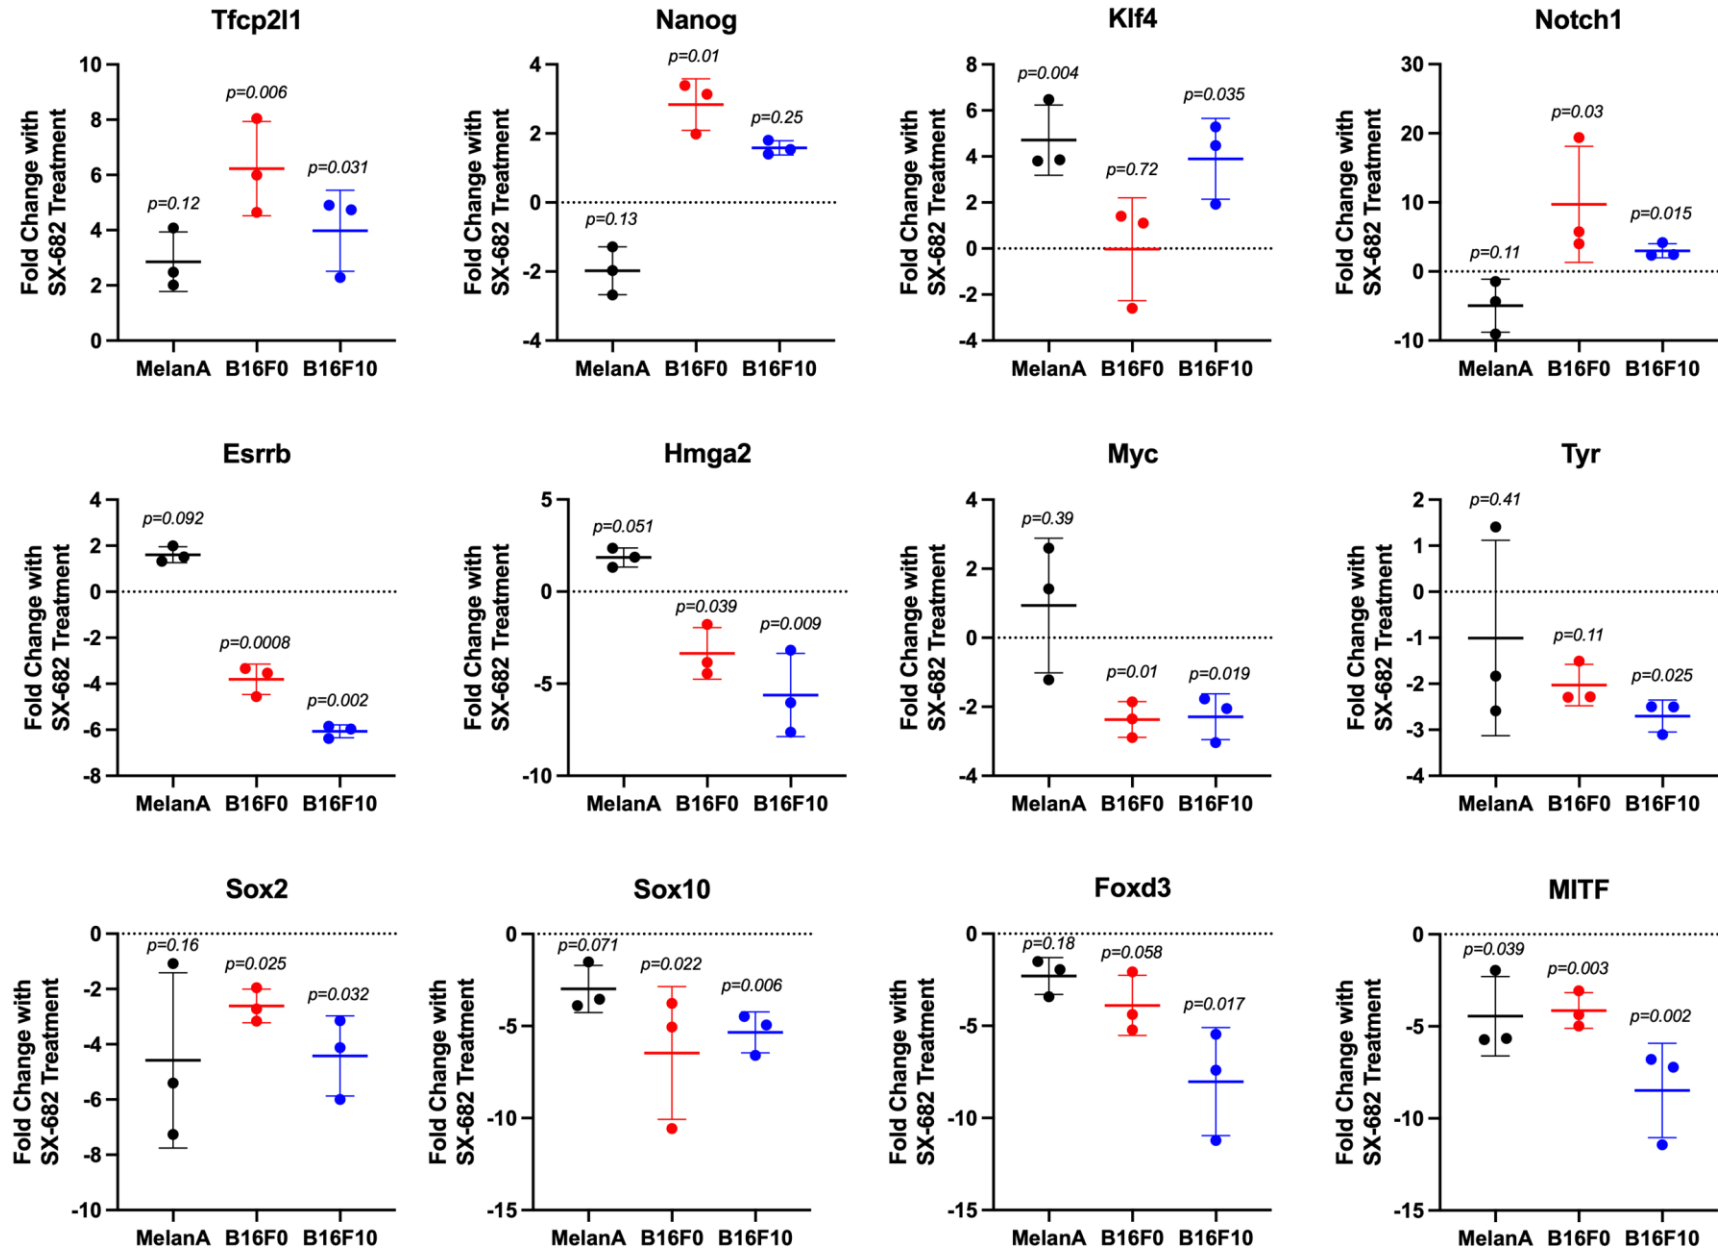

Figure S11

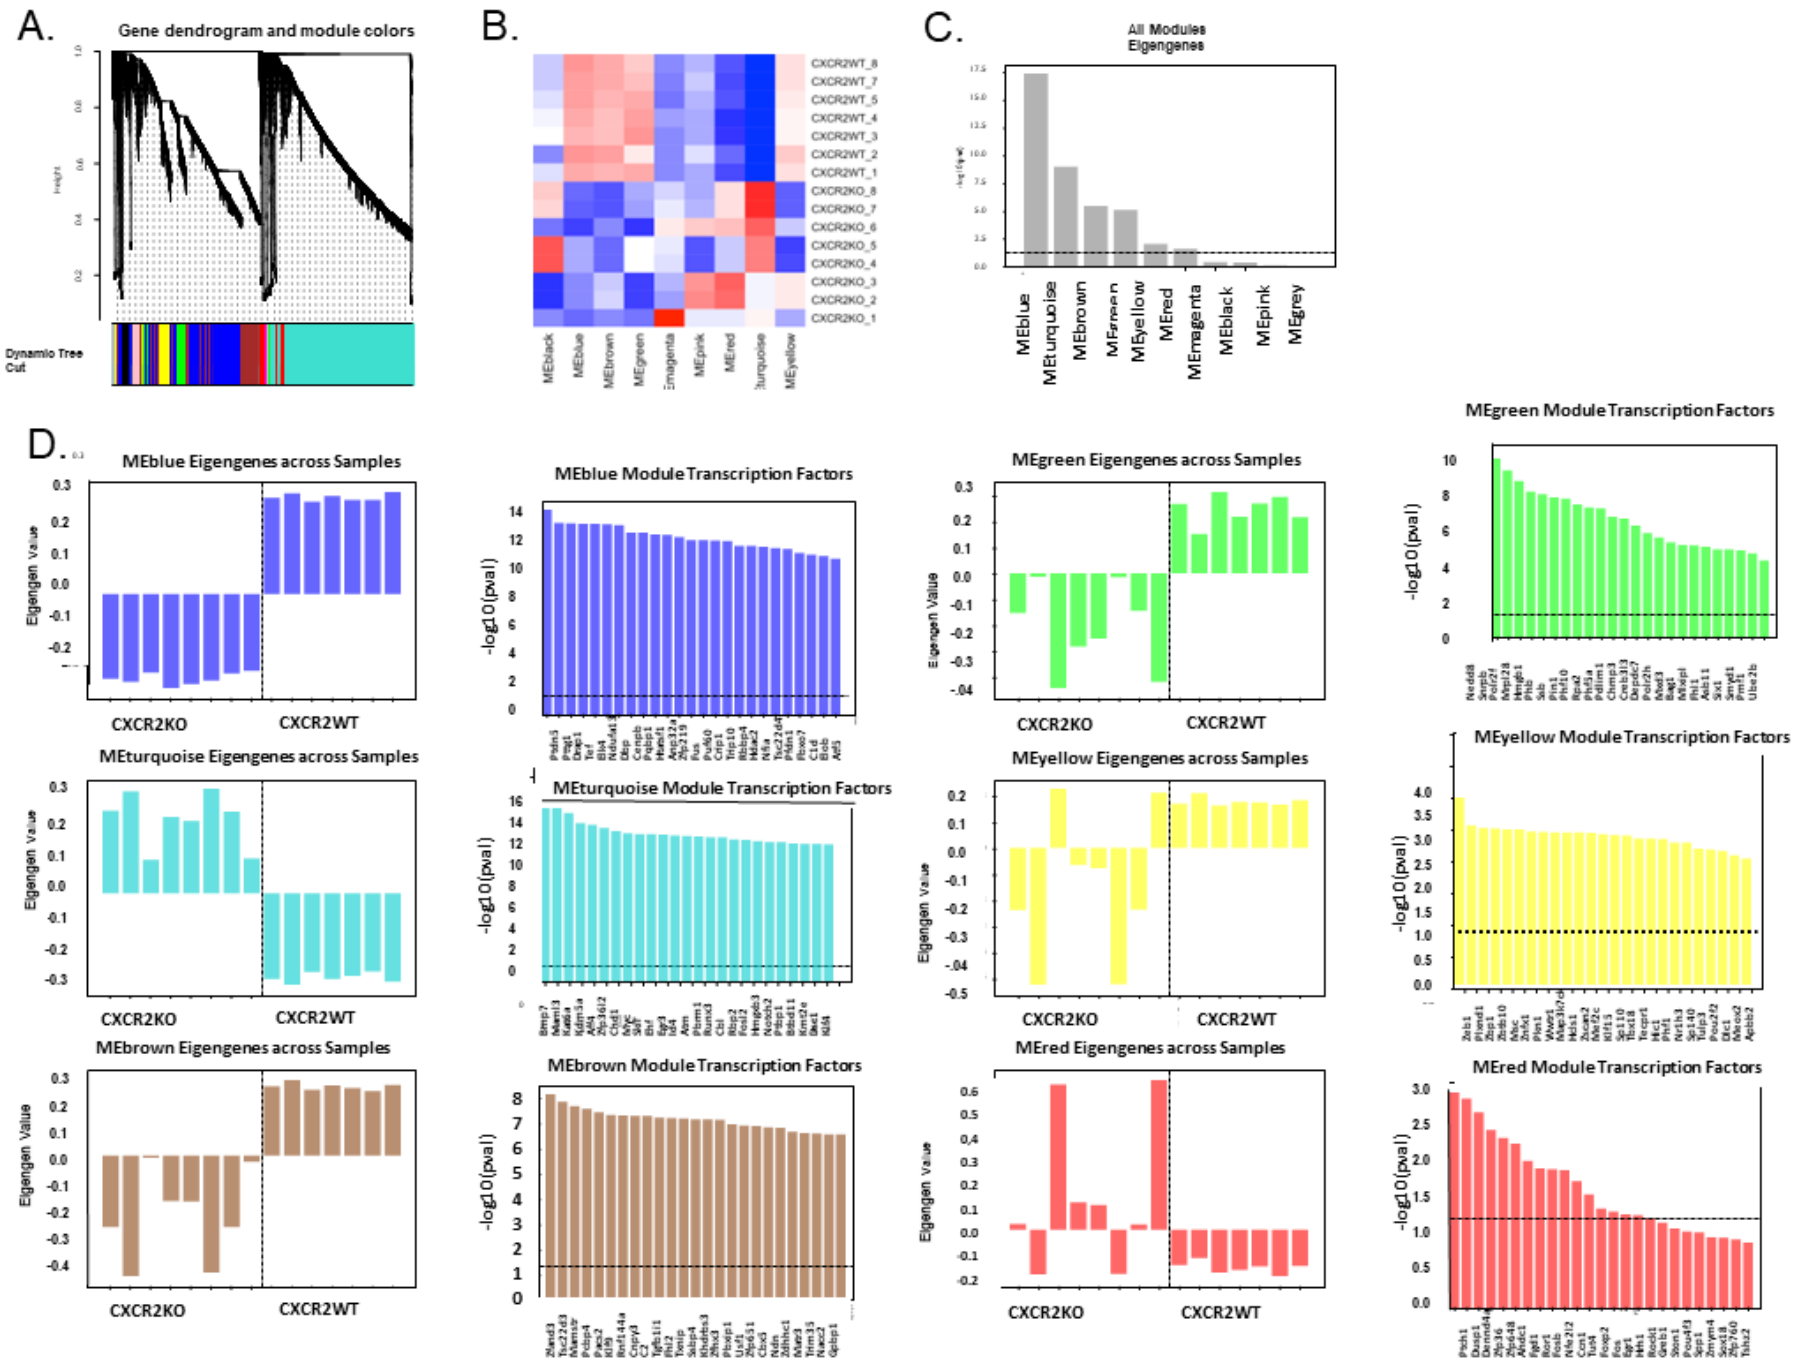

Figure S12

A. Terms from Genes with Increased Expression

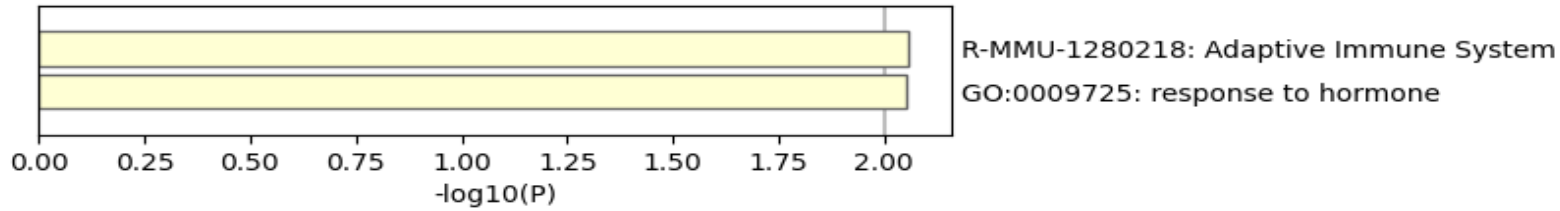

B. Terms from Genes with Decreased Expression

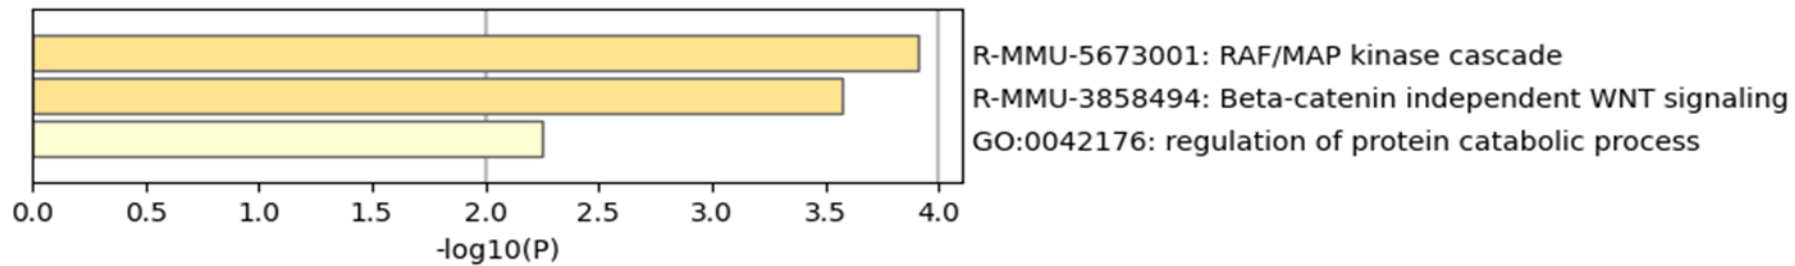

C. Gene Overlap Analysis Heat Map of Selected GO Parent Files

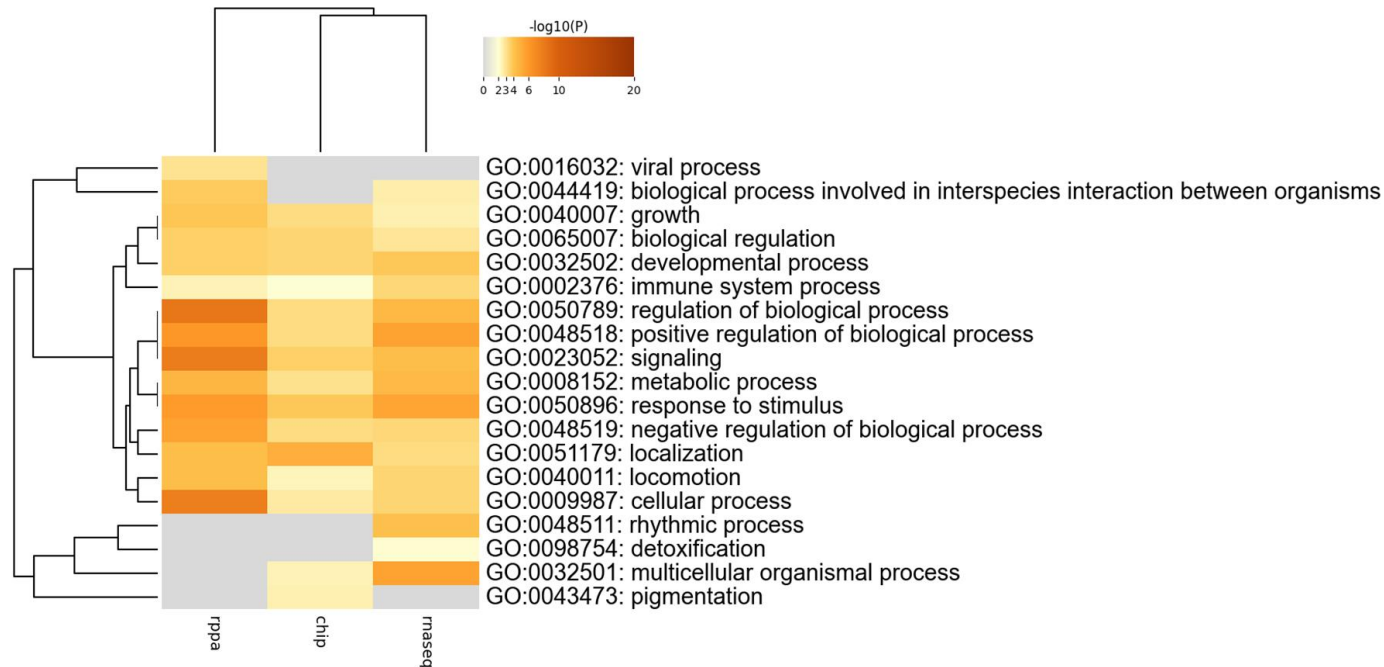

Gene Overlap Analysis—Expanded via Shared Enriched Ontologies

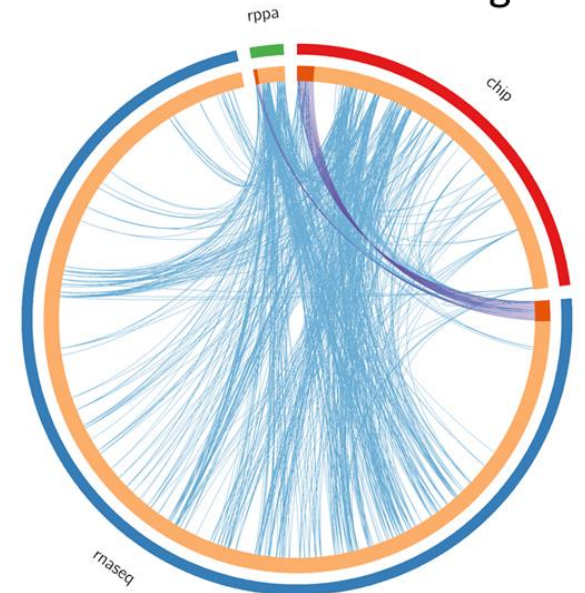

Figure S12D

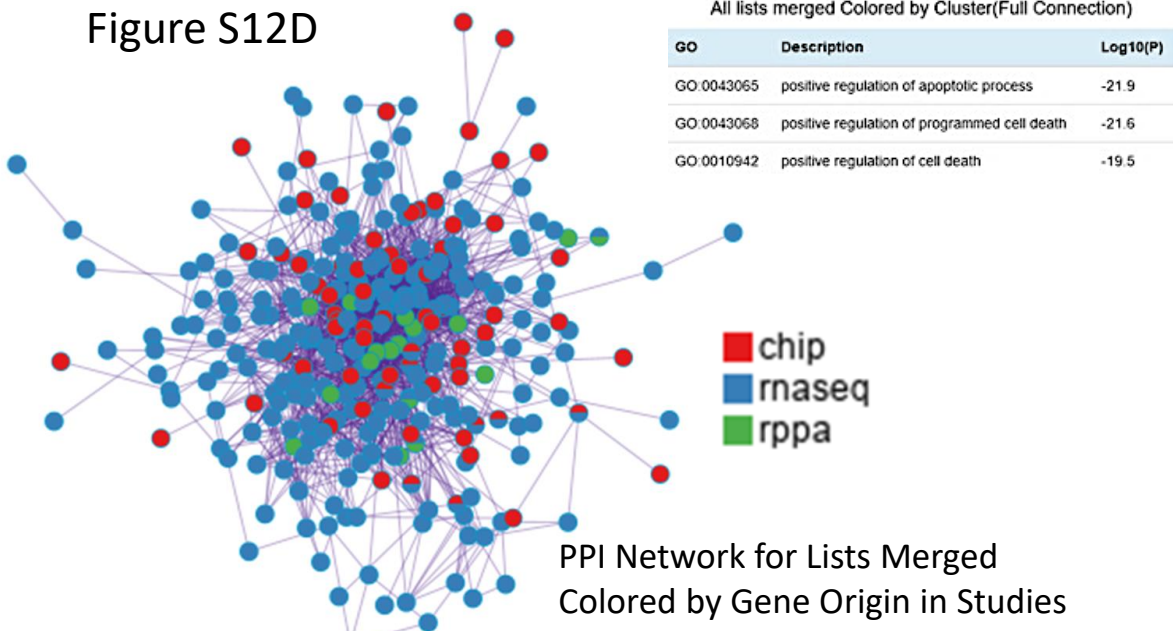

Figure S12E

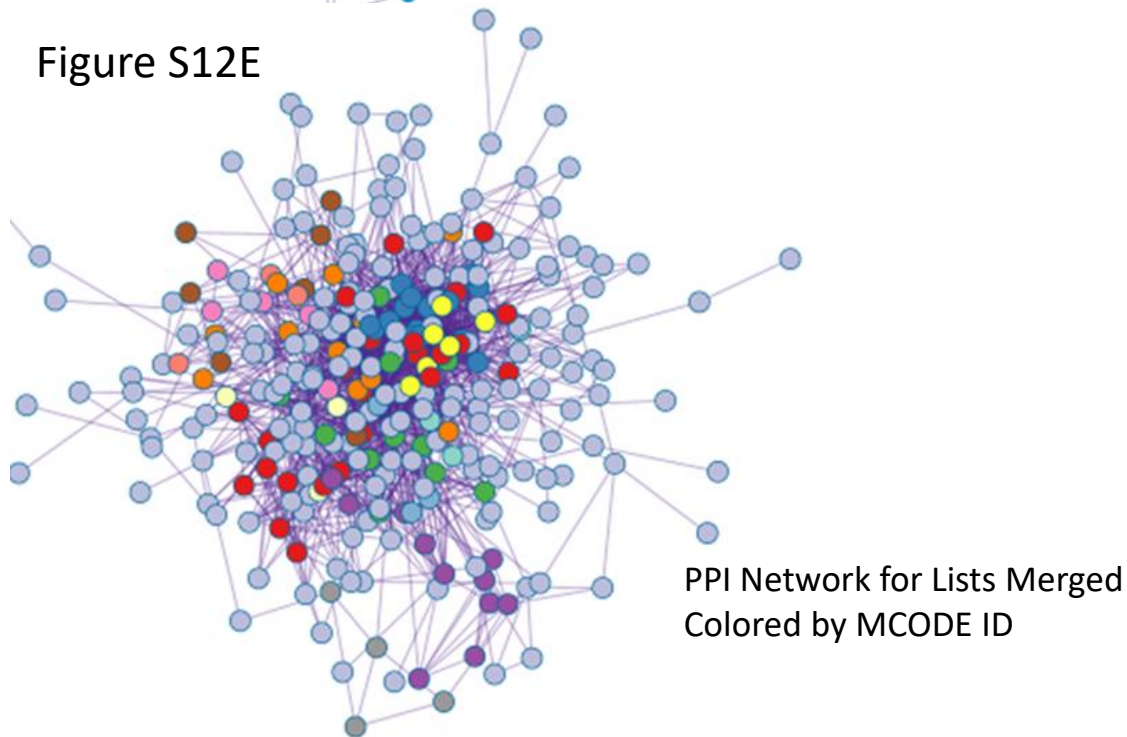

All lists merged Colored by Cluster(Keep MCODE Nodes Only)

| Color  | MCODE   | GO            | Description                                                                           | Log10(P) |
|--------|---------|---------------|---------------------------------------------------------------------------------------|----------|
| Red    | MCODE_1 | R-MMU-212300  | PRC2 methylates histones and DNA                                                      | -15.6    |
| Red    | MCODE_1 | R-MMU-8936459 | RUNX1 regulates genes involved in megakaryocyte differentiation and platelet function | -15.4    |
| Red    | MCODE_1 | R-MMU-212165  | Epigenetic regulation of gene expression                                              | -14.3    |
| Blue   | MCODE_2 | WP6           | Integrin-mediated cell adhesion                                                       | -17.3    |
| Blue   | MCODE_2 | WP85          | Focal adhesion                                                                        | -17.1    |
| Blue   | MCODE_2 | mmu04510      | Focal adhesion - Mus musculus (house mouse)                                           | -14.5    |
| Green  | MCODE_3 | GO:0006366    | transcription by RNA polymerase II                                                    | -6.4     |
| Green  | MCODE_3 | GO:0006351    | DNA-templated transcription                                                           | -5.6     |
| Green  | MCODE_3 | GO:0097659    | nucleic acid-templated transcription                                                  | -5.6     |
| Purple | MCODE_4 | mmu00480      | Glutathione metabolism - Mus musculus (house mouse)                                   | -12.2    |
| Purple | MCODE_4 | GO:0006749    | glutathione metabolic process                                                         | -11.9    |
| Purple | MCODE_4 | R-MMU-156590  | Glutathione conjugation                                                               | -11.2    |
| Orange | MCODE_5 | R-MMU-5358351 | Signaling by Hedgehog                                                                 | -8.3     |
| Orange | MCODE_5 | R-MMU-2262752 | Cellular responses to stress                                                          | -7.4     |
| Orange | MCODE_5 | R-MMU-8953897 | Cellular responses to stimuli                                                         | -7.4     |

|        |          |               |                                                                  |       |
|--------|----------|---------------|------------------------------------------------------------------|-------|
| Yellow | MCODE_6  | GO:0007169    | transmembrane receptor protein tyrosine kinase signaling pathway | -7.3  |
| Yellow | MCODE_6  | GO:0030335    | positive regulation of cell migration                            | -6.5  |
| Yellow | MCODE_6  | GO:2000147    | positive regulation of cell motility                             | -6.4  |
| Brown  | MCODE_7  | mmu04710      | Circadian rhythm - Mus musculus (house mouse)                    | -9.7  |
| Brown  | MCODE_7  | GO:0032922    | circadian regulation of gene expression                          | -8.3  |
| Brown  | MCODE_7  | GO:0007623    | circadian rhythm                                                 | -7.2  |
| Pink   | MCODE_8  | R-MMU-72187   | miRNA 3'-end processing                                          | -9.7  |
| Pink   | MCODE_8  | R-MMU-73856   | RNA Polymerase II Transcription Termination                      | -9.4  |
| Pink   | MCODE_8  | GO:0006397    | miRNA processing                                                 | -8.5  |
| Grey   | MCODE_9  | mmu00900      | Terpenoid backbone biosynthesis - Mus musculus (house mouse)     | -11.9 |
| Grey   | MCODE_9  | WP4346        | Cholesterol metabolism with Bloch and Kandutsch-Russell pathways | -10.5 |
| Grey   | MCODE_9  | mmu00650      | Butanoate metabolism - Mus musculus (house mouse)                | -8.1  |
| Teal   | MCODE_10 | GO:1900745    | positive regulation of p38MAPK cascade                           | -8.6  |
| Teal   | MCODE_10 | mmu05216      | Thyroid cancer - Mus musculus (house mouse)                      | -8.3  |
| Teal   | MCODE_10 | GO:1900744    | regulation of p38MAPK cascade                                    | -8.1  |
| Red    | MCODE_13 | R-MMU-1280218 | Adaptive Immune System                                           | -4.5  |
| Blue   | MCODE_14 | GO:0070227    | lymphocyte apoptotic process                                     | -7.7  |
| Blue   | MCODE_14 | GO:0071887    | leukocyte apoptotic process                                      | -7.5  |
| Blue   | MCODE_14 | GO:0008630    | intrinsic apoptotic signaling pathway in response to DNA damage  | -7.2  |

Figure S13

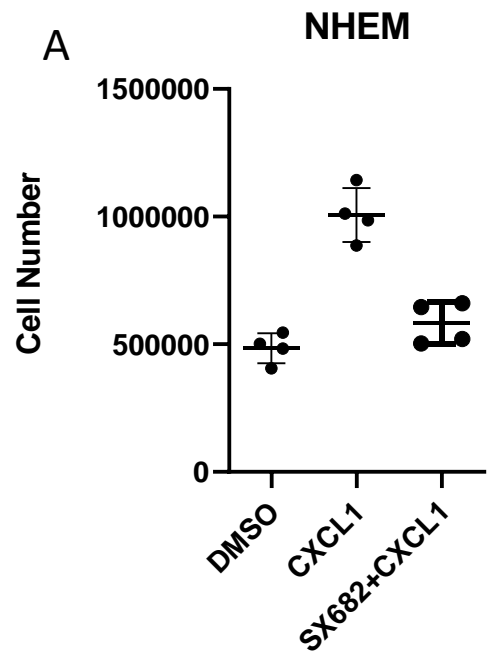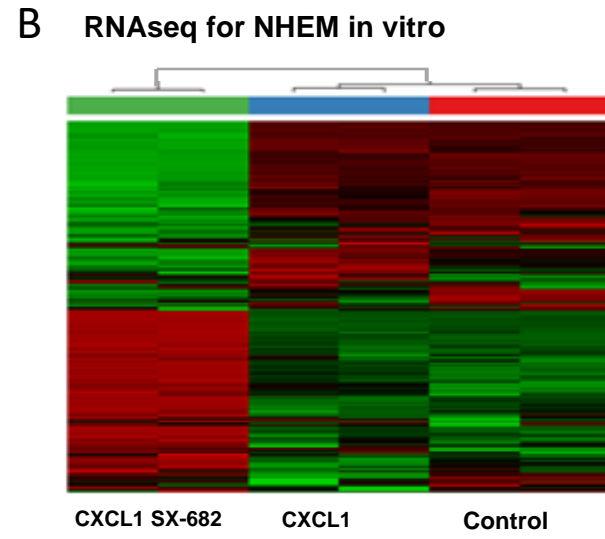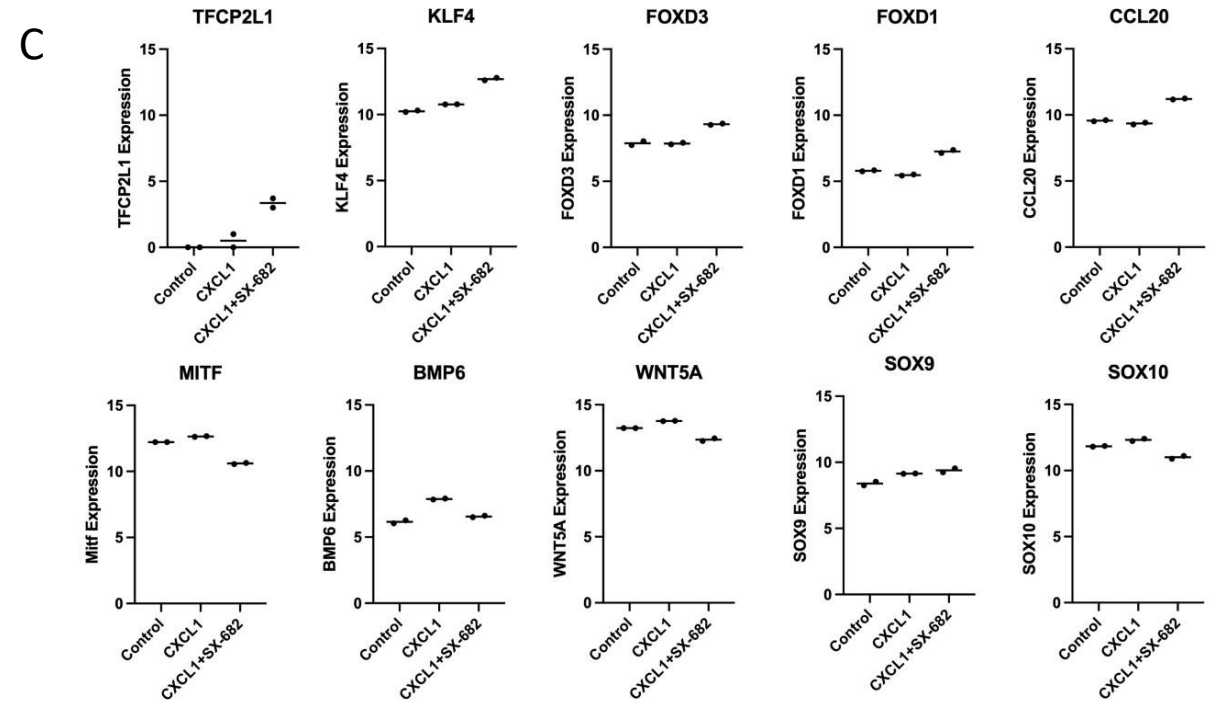

Table S1

| Cytokines, Chemokines, and Interleukins |                                            |                                                         |
|-----------------------------------------|--------------------------------------------|---------------------------------------------------------|
| Gene                                    | CXCL1 vs. Control<br>log2FC (adj. p value) | CXCL1 + SX-682 vs. CXCL1 alone<br>log2FC (adj. p value) |
| CCL18                                   | -0.388 (0.555)                             | -1.766 (9.67e-4)                                        |
| CCL2                                    | -0.426 (1.19e-22)                          | -6.537 (<1e-310)                                        |
| CCL20                                   | -0.298 (0.044)                             | 1.612 (1.42e-68)                                        |
| CCL7                                    | -0.405 (0.052)                             | -9.397 (2.18e-10)                                       |
| CCL8                                    | 0.009 (0.982)                              | -9.753 (4e-11)                                          |
| CXCL1                                   | -0.345 (2.9e-19)                           | -4.033 (<1e-310)                                        |
| CXCL10                                  | -1.476 (4.06e-9)                           | -1.471 (1.74e-4)                                        |
| CXCL11                                  | -1.425 (2.3e-5)                            | -0.482 (0.324)                                          |
| CXCL12                                  | 0.710 (3.74e-18)                           | -6.13 (1.05e-232)                                       |
| CXCL2                                   | -0.002 (0.993)                             | -1.219 (2.24e-46)                                       |
| CXCL3                                   | -0.361 (0.001)                             | -1.384 (2.45e-28)                                       |
| CXCL5                                   | -0.62 (3.86e-36)                           | -1.604 (6.37e-181)                                      |
| CXCL6                                   | -0.386 (5.38e-15)                          | -5.928 (<1e-310)                                        |
| CXCL8                                   | -0.497 (7.99e-30)                          | -1.319 (5.89e-199)                                      |
| IL11                                    | 1.001 (2.75e-23)                           | -0.285 (0.002)                                          |
| IL11RA                                  | 0.011 (0.97)                               | -1.622 (2.51e-21)                                       |
| IL12RB2                                 | 0.51 (0.041)                               | -1.288 (2.57e-9)                                        |
| IL13RA1                                 | -0.086 (0.233)                             | -0.358 (1.42e-12)                                       |
| IL15RA                                  | -0.37 (0.406)                              | 1.693 (1.46e-14)                                        |
| IL16                                    | -0.267 (0.40)                              | -2.293 (1.01e-14)                                       |
| IL17RB                                  | 0.019 (0.971)                              | 0.739 (5.66e-4)                                         |
| IL17RD                                  | -0.190 (0.362)                             | -0.465 (0.003)                                          |
| IL17RE                                  | 0.229 (0.718)                              | -0.794 (0.042)                                          |
| IL18BP                                  | 0.052 (0.907)                              | 0.704 (3e-4)                                            |
| IL18R1                                  | 0.884 (0.025)                              | 2.688 (4.89e-60)                                        |
| IL1R1                                   | 0.293 (6.71e-11)                           | -2.017 (<1e-310)                                        |
| IL1RL1                                  | 1.968 (5.41e-5)                            | 3.916 (6.28e-141)                                       |
| IL24                                    | -0.123 (0.204)                             | -0.313 (1.38e-5)                                        |
| IL27RA                                  | -0.223 (0.316)                             | -0.601 (4.75e-4)                                        |
| IL33                                    | 0.689 (0.037)                              | -4.154 (1.45e-21)                                       |
| IL34                                    | -1.609 (7.45e-13)                          | -0.166 (0.639)                                          |
| IL4R                                    | 0.027 (0.791)                              | -0.494 (6.65e-22)                                       |
| IL6                                     | 0.025 (0.771)                              | -0.82 (6.57e-77)                                        |
| IL6R                                    | 0.089 (0.59)                               | -1.611 (4.21e-51)                                       |
| IL7                                     | -0.569 (0.023)                             | 1.122 (3.5e-10)                                         |
| IL7R                                    | -0.259 (0.487)                             | -1.025 (4.34e-4)                                        |

Table S2

| TNF Related Cytokines and Interferons |                                            |                                                         |
|---------------------------------------|--------------------------------------------|---------------------------------------------------------|
| Gene                                  | CXCL1 vs. Control<br>log2FC (adj. p value) | CXCL1 + SX-682 vs. CXCL1 alone<br>log2FC (adj. p value) |
| C1QTNF1                               | -0.135 (0.008)                             | -1.446 (6.63e-243)                                      |
| C1QTNF2                               | -1.013 (0.017)                             | -4.923 (7.33e-8)                                        |
| C1QTNF6                               | 0.142 (0.246)                              | -2.543 (4.08e-117)                                      |
| TNFAIP1                               | 0.011 (0.921)                              | -0.22 (2.66e-5)                                         |
| TNFAIP2                               | -0.345 (0.004)                             | -1.283 (4.44e-24)                                       |
| TNFAIP3                               | -0.261 (5.54e-6)                           | -1.066 (1.15e-79)                                       |
| TNFAIP6                               | 0.044 (0.873)                              | -2.854 (6.99e-50)                                       |
| TNFAIP8                               | -0.707 (4.81e-18)                          | -1.323 (2.97e-38)                                       |
| TNFAIP8L1                             | -0.334 (0.044)                             | -2.102 (1.8e-33)                                        |
| TNFAIP8L3                             | -0.048 (0.696)                             | -0.894 (3.21e-36)                                       |
| TNFRSF10A                             | 0.051 (0.822)                              | 0.307 (0.006)                                           |
| TNFRSF10B                             | 0.012 (0.899)                              | 1.231 (4.85e-177)                                       |
| TNFRSF10D                             | 0.223 (0.001)                              | -1.663 (2.06e-136)                                      |
| TNFRSF11B                             | -0.168 (0.235)                             | -2.937 (8.15e-91)                                       |
| TNFRSF12A                             | -0.194 (0.428)                             | 0.659 (8.34e-6)                                         |
| TNFRSF14                              | 0.245 (0.001)                              | 0.047 (0.515)                                           |
| TNFRSF18                              | -0.069 (0.942)                             | -2.208 (4.24e-4)                                        |
| TNFRSF19                              | 0.093 (0.344)                              | -2.891 (3.17e-230)                                      |
| TNFRSF1A                              | 0.294 (2.96e-11)                           | -0.989 (6.79e-127)                                      |
| TNFRSF1B                              | -0.151 (0.0507)                            | -1.757 (3.73e-131)                                      |
| TNFRSF21                              | 0.094 (0.10)                               | -3.004 (<1e-310)                                        |
| TNFSF11                               | 0.898 (1.46e-55)                           | -3.465 (<1e-310)                                        |
| TNFSF12                               | -0.315 (0.031)                             | -1.333 (2.23e-20)                                       |
| TNFSF13B                              | 0.291 (0.145)                              | -3.421 (1.04e-53)                                       |
| TNFSF4                                | -0.493 (0.052)                             | 1.161 (2.51e-11)                                        |
| IFNAR1                                | -0.074 (0.346)                             | -0.785 (7.76e-49)                                       |
| IFNAR2                                | 0.132 (0.801)                              | -1.343 (2.31e-5)                                        |
| IFNGR1                                | 0.144 (0.026)                              | 0.059 (0.309)                                           |
| IFNGR2                                | -0.109 (0.193)                             | -0.612 (1.45e-22)                                       |
| IFNLR1                                | -0.022 (0.963)                             | -1.212 (4.26e-6)                                        |

Table S3.

| Cancer               | Mouse tumor model                                | CXCR1/2 inhibitor | Single agent activity* | Initiation of SX-682 Tx (days)** | Combination activity*, added agent(s) | Reference                             |
|----------------------|--------------------------------------------------|-------------------|------------------------|----------------------------------|---------------------------------------|---------------------------------------|
| <b>Prostate</b>      | G: CPPSML                                        | SX-682            | Yes                    | 3 weeks                          | Yes, ICB1                             | Nature 2017 <sup>1</sup>              |
| <b>Melanoma</b>      | S: B16                                           | SX-682            | Yes                    | 10 – 14                          | Yes, anti-PD1                         | Unpublished 2016                      |
| <b>Melanoma</b>      | S: Rich1.1                                       | SX-682            | Yes                    | -7                               | Yes, anti-PD1                         | Cancer Immunol Res 2020 <sup>2</sup>  |
| <b>H&amp;N, Lung</b> | S: MOC1, LLC                                     | SX-682            | No                     | 10                               | Yes, anti-PD1, ET                     | JCI Insight 2019 <sup>3</sup>         |
| <b>Lung</b>          | G: Pten <sup>fl/fl</sup> ; Lkb1 <sup>fl/fl</sup> | SX-682            | No                     | 30 weeks                         | Yes, anti-PD1                         | JCI Insight 2019 <sup>4</sup>         |
| <b>Colon</b>         | S: MC38K                                         | SX-682            | Yes                    | 7                                | Yes, anti-PD1                         | Cancer Cell 2020 <sup>5</sup>         |
| <b>H&amp;N</b>       | S: MOC2                                          | SX-682            | Yes                    | 7                                | Yes, KIL                              | Clin Cancer Res 2020 <sup>6</sup>     |
| <b>Breast</b>        | X: MDA-MB-231, S: 4T1                            | SX-682            | Yes                    | 7                                | Yes, bintrafusp                       | J Immunother Cancer 2020 <sup>7</sup> |
| <b>Colon</b>         | S: MC38-CEA                                      | SX-682            | NT                     | 7                                | Yes, bintra, vacc                     | Cancers 2021 <sup>8</sup>             |
| <b>Breast (DCIS)</b> | G: caErbB2 lentivirus                            | SX-682            | Yes                    | 7                                | NT                                    | Nat Commun 2021 <sup>9</sup>          |
| <b>Lung</b>          | S: Kras <sup>G12D</sup> ;Trp53 <sup>-/-</sup>    | SX-682            | Yes                    | 20 weeks                         | Yes, SHP099                           | Cancer Discov 2022 <sup>10</sup>      |
| <b>Pancreatic</b>    | S: iKRAS, G: iKRAS                               | SX-682            | Yes                    | >10                              | Yes, ICB2                             | Nature Cancer 2022 <sup>11</sup>      |



1 **Supplemental Figure Legends:**

2 Figure S1. Breakdown of CXCR2 (A) and CXCL1 (B) expression in nevi and melanoma  
3 from TCGA, separated based on BRAF and NRAS mutation status. Data were analyzed  
4 with a two-way ANOVA and no significant differences were found.

5 Figure S2. Diagram showing strategy for development of *Tyr-Cre<sup>ER</sup>::Braf<sup>V600E</sup>::Pten<sup>-/-</sup>*  
6 *::mT/mG<sup>fl/fl</sup>::Cxcr2<sup>fl/fl</sup>* and *Tyr-Cre<sup>ER+</sup>::NRas<sup>Q61R</sup>::Ink4a<sup>-/-</sup>::Cxcr2<sup>fl/fl</sup>* mice (A, B, figures  
7 created using Biorender). Image of GFP-expressing *Braf<sup>V600E</sup>/Pten<sup>-/-</sup>* tumors *in vivo* and  
8 via histology (C). Immediately after 4HT administration, single cells were isolated from  
9 the mouse skin and stained with anti-CXCR2 for FACS analysis of CD45- GFP+ cells.  
10 The loss of CXCR2 is apparent in the *Cxcr2<sup>fl/fl</sup>* skin (D). FACS analysis of GFP+ cells after  
11 tumors have formed indicates that ~30% of GFP+ cells in the *Cxcr2<sup>fl/fl</sup>* tumors are positive  
12 for CXCR2 staining, compared to ~65% in the *Cxcr2<sup>WT</sup>* tumors (E). Immunohistochemistry  
13 *Cxcr2<sup>WT</sup>* and *Cxcr2<sup>-/-</sup>* tumors shows approximately equivalent staining of the  
14 melanocyte/melanoma markers SOX10 and S100 in both tumors. We also see that  
15 membranous CXCR2 is higher in the *Cxcr2<sup>WT</sup>* tumors.

16 Figure S3. Heat maps of the most differentially expressed genes in tumors from the  
17 *Braf<sup>V600E</sup>/Pten<sup>-/-</sup>* mice with or without loss of CXCR2 in tumor cells (A), with control or SX-  
18 682 treatment (B), and in MelanA, B16F0, and B16F10 cells treated with DMSO or SX-  
19 682 (C). Tumor suppressive genes are listed in red, genes involved in growth are in green,  
20 immune related genes are in blue, differentiation/stemness genes are in purple, and  
21 motility and cell adhesion genes are in brown.

22 Figure S4. Heat map showing genes involved in growth that are suppressed (A) and  
23 genes involved in growth suppression that are induced (B) in *Braf<sup>V600E</sup>/Pten<sup>-/-</sup>/Cxcr2<sup>-/-</sup>*  
24 melanoma tumors. Red arrows indicate genes involved in growth/oncogenes (A) and  
25 inhibition of growth/tumor suppression (B).

26 Figure S5. Additional data from analysis of immune cells and cytokines expressed by  
27 *Braf/Pten/Cxcr2<sup>-/-</sup>* and *Braf/Pten/Cxcr2<sup>WT</sup>* tumors. mMCPCounter predicted infiltrate of B-  
28 derived cells, memory B cells, neutrophils, endothelial cells, mast cells, basophils,  
29 eosinophils, and blood vessels (A). FACS analysis of peripheral blood CD45+ cells from  
30 *Braf/Pten/Cxcr2<sup>-/-</sup>* and *Braf/Pten/Cxcr2<sup>WT</sup>* mice (B). Results of cytokine array of tumor  
31 lysates from *Braf/Pten/Cxcr2<sup>-/-</sup>* and *Braf/Pten/Cxcr2<sup>WT</sup>* melanoma tumors, expressed as  
32 fold change in *Cxcr2<sup>-/-</sup>* compared to *Cxcr2<sup>WT</sup>* (CCL20 removed and shown in Figure 3D to  
33 allow proper visualization) (C). FACS analysis of CD45+ cells from *Braf/Pten/Cxcr2<sup>-/-</sup>* and  
34 *Braf/Pten/Cxcr2<sup>WT</sup>* tumors (D). Statistical analyses: (A), (C), (D) Welch's t-test

35 Figure S6. Immunohistochemical staining was performed for Iba (a macrophage marker),  
36 CD3+ (total) T cells, CD4+ T cells, and CD8+T cells. As seen in FACS analysis, IHC  
37 indicates that there are approximately equal amounts of Iba+ macrophages and CD4+ T  
38 cells between the genotypes, with an increase in CD8+ cells in *Braf/Pten/Cxcr2<sup>-/-</sup>* tumors  
39 (A). Peripheral blood from *Braf/Pten/Cxcr2<sup>-/-</sup>* and *Braf/Pten/Cxcr2<sup>WT</sup>* mice were analyzed  
40 via FACS and revealed no baseline differences in immune cell populations (B). Statistical  
41 analysis: (B) Welch's t-test

42 Figure S7. Additional data from analysis of immune cells from SX-682-treated  
43 *Braf<sup>V600E</sup>/Pten<sup>-/-</sup>/Cxcr2<sup>WT</sup>* tumors. mMCPCounter predictions for T cells, B-derived cells,  
44 memory B cells, NK cells, endothelial, monocytes, macrophages, fibroblasts, lymphatics,

45 mast, basophils, eosinophils, and blood vessels (A). FACS analysis of peripheral blood  
46 CD45+ cells from tumor-bearing mice fed SX-682 or control chow (B). FACS analysis of  
47 CD45+ cells in SX-682 treated or control tumors (C).

48 To determine the hematological effects of SX-682, toxicology studies were performed at  
49 the IIT Research Institute (Chicago, IL). This study was conducted in compliance with  
50 the U.S. Food and Drug Administration (FDA) Good Laboratory Practice (GLP)  
51 Regulations (Code of Federal Regulations Title 21 Part 58). SX-682 was administered  
52 orally for 28 consecutive days (followed by 14 days of recovery) to male and female CD®  
53 IGS rats. The study consisted of four groups: Group 1, vehicle control (19 rats/sex);  
54 Group 2, 50 mg/kg/day SX-682 (17 rats/sex); Group 3, 150 mg/kg/day SX-682 (17  
55 rats/sex); and Group 4, 250 mg/kg/day SX-682 (22 rats/sex). Ten rats/sex/group were  
56 necropsied on Study Day 29 (terminal necropsy) and 5 rats/sex in Groups 1 and 4 were  
57 necropsied on Study Day 43 (recovery necropsy). Rats subjected to plasma drug level  
58 and toxicokinetic analyses (3 rats/sex in Group 1 and 6 rats/sex in Groups 2-4) were bled  
59 at approximately 0.5, 1, 2, 4, 8, and 24 hours after the 1st and 28th dose. Consistent with  
60 the expected mechanism of SX-682, there was a dose-dependent but reversible reduction  
61 in absolute neutrophil count of no toxicological significance (D). C56BL/6 mice were treated  
62 with 50mg/kg SX-682 daily via oral gavage for 4 days prior to analysis of peripheral blood  
63 leukocytes via FACS. SX-682 reduced the percentage of Ly6G+ cells that were CD14+  
64 ( $p=0.04$ ) and increased the percentage of CD45+ Cells that were CD19+ ( $p=0.026$ ) (E).

65 Statistical analyses: (A), (B), (C), (D) Welch's t-test

66 Figure S8. Effects of SX-682 on MelanA, B16F0, and B16F10 cell lines. MelanA, B16F0,  
67 and B16F10 cells were treated with SX-682 (5 $\mu$ M) or DMSO, and cell number was

68 evaluated at days 1-4 post treatment. Data were analyzed on a natural log scale and  
69 compared using two-way ANOVA with BH correction for multiple tests (A). Cell lines were  
70 treated for 24 hours with SX-682 or DMSO prior to RNA isolation and sequencing. A heat  
71 map shows that genes were commonly suppressed or induced in all three cell lines (B).  
72 Reverse-phase phosphoproteome analysis (RPPA) was also performed on cells treated  
73 for 24 hours with SX-682 or DMSO. Volcano plot showing phosphoproteins commonly  
74 altered by SX-682 treatment in MelanA, B16F0, and B16F10 cells (C). A heat map  
75 showing differential expression of commonly suppressed or induced phosphoproteins in  
76 response to treatment with 5 $\mu$ M SX-682 for 24 hours (D). Cytokine array of cell lysates  
77 from MelanA, B16F0, and B16F10 cells treated with SX-682 (5 $\mu$ M) for 24 hours as  
78 compared to those treated with DMSO (E).

79 Figure S9. Expression of *Tfcp2l1*-related genes and tumor markers based on RNAseq  
80 analysis in *Braf*<sup>V600E</sup>/*Pten*<sup>-/-</sup>/*Cxcr2*<sup>-/-</sup> tumors, *Braf*<sup>V600E</sup>/*Pten*<sup>-/-</sup> tumors treated with SX-682,  
81 compared to appropriate controls. Statistical analysis: Welch's t-test

82 Figure S10. Expression of *Tfcp2l1*-related genes based upon RT-PCR analysis. MelanA,  
83 B16F0, and B16F10 cells were treated with SX-682 (5 $\mu$ M) for 24 hours prior to RNA  
84 extraction, quantification, and RT-PCR using primers specific for *Tfcp2L1*, *Foxd3*, *Sox2*,  
85 *Sox10*, *Notch1*, *Hmga2*, *Mitf*, *Klf4*, *Myc*, *Nanog*, *Esrrb* and *Tyr*. Data are plotted as fold-  
86 change compared to DMSO treated cultures. Statistical analysis: Welch's t-test

87 Figure S11. WGCNA orders genes into a dendrogram by their co-expression profiles  
88 across the samples. Gene modules at the bottom of the dendrogram show assignment  
89 into distinct clusters of co-expressed genes (A). Module eigengene expression value  
90 shown as a heatmap across WT and KO samples (B). Feature selection of modules by

91 ANOVA F-value (FDR-adjusted p-value). Six of 10 WGCNA gene modules can  
92 distinguish between conditions (C). Eigengene expression value across WT and KO  
93 samples shown as a bar-plot and significance of transcription factors (ordered by FDR-  
94 adjusted p-value) within each module for the six significant gene modules from panel D:  
95 blue, turquoise, brown, green, yellow, and red. These TFs are best at distinguishing  
96 between KO and WT samples in each module (D).

97 Figure S12. ChIPseq analysis of changes in gene promoter binding of TFCP2L1 antibody  
98 in B16F0 cells in response to SX-682 treatment. B16F0 cells were cultured overnight with  
99 either DMSO or SX-682. Cell extracts were incubated with anti-IgG or anti-TFCP2L1,  
100 cross-linked with a reversible cross-linker, and prepared and prepared for ChIP-seq  
101 analysis. Metascape analysis was used to examine enriched terms across input gene lists  
102 of SX-682 minus DMSO, colored by p-values. Top terms associated with TFCP2L1 bound  
103 promoters where gene expression was increased (A) and decreased (B) were identified.  
104 Metascape Analysis was used to compare the data sets from RPPA, ChIP, and RNAseq  
105 analyses of B16F0 cells treated with SX-682 as compared to respective controls (C).  
106 Cluster analysis of genes identified as regulated by SX-682 by ChIPseq, RNAseq, or  
107 RPPA, with commonly enriched GO terms across all three methods (D). Genes in Cluster  
108 analysis of S11D were colored by MCODE ID (E).

109 Figure S13. NHEM cells were cultured in melanocyte growth medium containing vehicle  
110 or CXCL1 (100ng/ml), or CXCL1 (100ng/ml) with 5  $\mu$ M SX-682. After 5 days of culture,  
111 the cell number was determined, and total RNA was extracted for RNAseq analysis.  
112 Effects of SX-682 on cell growth in vitro (A). Heatmap for RNAseq on NHEM. Five days  
113 after NHEMs were cultured with SX-682 and/or CXCL1, RNA was extracted and

114 subjected to RNAseq analysis(B). Expression values for key genes associated with  
115 response to CXCL1 or CXCL1 and SX-682 (C).

116 Table S1. Comparison of Cytokine, Chemokine, and Interleukin Expression Following  
117 CXCL1 or CXCL1+SX-682 Treatment. Key cytokines induced are highlighted in red and  
118 reduced are highlighted in green.

119 Table S2. Comparison of TNF-Related Cytokines and Interferon Expression Following  
120 CXCL1 or CXCL1+SX-682 Treatment. Key cytokines induced are highlighted in red and  
121 reduced are highlighted in green.

122 Table S3. Preclinical validations. \*Activity  $P < 0.05$ . \*\*time after tumor initiation.  
123 Abbreviations: CPPSML, PB-Cre+ PtenL/L p53L/L Smad4L/L mTmGL/+ LSL-LUCL/+,  
124 develops age-dependent green fluorescent protein (GFP+)LUC+ prostate cancer; ET,  
125 engineered T cells; G, genetically engineered; ICB1, immune checkpoint blockade (ICB)  
126 with anti-PD1 and anti-CTLA-4 cocktail; ICB2, anti-LAG3 and agonist-41BB ; KIL, murine  
127 NK cell line; MC38K and MC38-CEA, syngeneic MC38 colorectal cancer cell line with  
128 enforced expression of KRASG12D and CEA, respectively, NT, not tested; S, syngeneic;  
129 X, xenograft.

130

131

132 **Supplemental References:**

- 133 1. Lu X, Horner JW, Paul E, Shang X, Troncoso P, Deng P, et al. Effective  
134 combinatorial immunotherapy for castration-resistant prostate cancer. *Nature*.  
135 2017;543(7647):728-32.
- 136 2. Yang J, Yan C, Vilgelm AE, Chen SC, Ayers GD, Johnson CA, et al. Targeted  
137 Deletion of CXCR2 in Myeloid Cells Alters the Tumor Immune Environment to Improve  
138 Antitumor Immunity. *Cancer Immunol Res*. 2021;9(2):200-13.
- 139 3. Kargl J, Zhu X, Zhang H, Yang GHY, Friesen TJ, Shipley M, et al. Neutrophil  
140 content predicts lymphocyte depletion and anti-PD1 treatment failure in NSCLC. *JCI*  
141 *Insight*. 2019;4(24).
- 142 4. Sun L, Clavijo PE, Robbins Y, Patel P, Friedman J, Greene S, et al. Inhibiting  
143 myeloid-derived suppressor cell trafficking enhances T cell immunotherapy. *JCI Insight*.  
144 2019;4(7).
- 145 5. Liao W, Overman MJ, Boutin AT, Shang X, Zhao D, Dey P, et al. KRAS-IRF2 Axis  
146 Drives Immune Suppression and Immune Therapy Resistance in Colorectal Cancer.  
147 *Cancer Cell*. 2019;35(4):559-72 e7.
- 148 6. Greene S, Robbins Y, Mydlarz WK, Huynh AP, Schmitt NC, Friedman J, et al.  
149 Inhibition of MDSC Trafficking with SX-682, a CXCR1/2 Inhibitor, Enhances NK-Cell  
150 Immunotherapy in Head and Neck Cancer Models. *Clin Cancer Res*. 2020;26(6):1420-  
151 31.
- 152 7. Horn LA, Riskin J, Hempel HA, Fousek K, Lind H, Hamilton DH, et al. Simultaneous  
153 inhibition of CXCR1/2, TGF-beta, and PD-L1 remodels the tumor and its  
154 microenvironment to drive antitumor immunity. *J Immunother Cancer*. 2020;8(1).
- 155 8. Horn LA, Fousek K, Hamilton DH, Hodge JW, Zebala JA, Maeda DY, et al. Vaccine  
156 Increases the Diversity and Activation of Intratumoral T Cells in the Context of  
157 Combination Immunotherapy. *Cancers (Basel)*. 2021;13(5).
- 158 9. Sinha VC, Rinkenbaugh AL, Xu M, Zhou X, Zhang X, Jeter-Jones S, et al. Single-  
159 cell evaluation reveals shifts in the tumor-immune niches that shape and maintain  
160 aggressive lesions in the breast. *Nat Commun*. 2021;12(1):5024.
- 161 10. Tang KH, Li S, Khodadadi-Jamayran A, Jen J, Han H, Guidry K, et al. Combined  
162 Inhibition of SHP2 and CXCR1/2 Promotes Antitumor T-cell Response in NSCLC. *Cancer*  
163 *Discov*. 2022;12(1):47-61.
- 164 11. Gulhati P, Schalck A, Jiang S, Shang X, Wu CJ, Hou P, et al. Targeting T cell  
165 checkpoints 41BB and LAG3 and myeloid cell CXCR1/CXCR2 results in antitumor  
166 immunity and durable response in pancreatic cancer. *Nat Cancer*. 2023;4(1):62-80.

167

1 **Supplementary Methods:**

2 **Analysis of patient sequencing data.**

3 RNA-Seq analysis of CXCL1, 2, 3, 5, and 8 from utilized patient nevi and melanoma  
4 samples available at NCBI Gene Expression Omnibus (GEO) under accession number  
5 GSE112509, including human nevi (n=23) and melanoma (n=57) samples. Bulk RNA-  
6 Seq analysis was performed as described previously (1). Differential mRNA gene  
7 expression was determined and normalized with the DESeq2 tool (Love et al., 2014)  
8 (Figure 1A, 1B). To analyze patient overall survival in reference to high or low CXCR2  
9 expression, the Cancer Genome Atlas (TCGA) skin cutaneous melanoma (SKCM)  
10 dataset was analyzed using the Gene Expression Profiling Interactive Analysis (GEPIA)  
11 program. To generate the overall survival plot, the upper and lower quartiles of CXCR2  
12 expression were used to stratify the groups (Figure 1C). For analysis of the CXCR2  
13 expression level predictive value in therapeutic response to immune checkpoint blockade  
14 in melanoma patients a Kaplan-Meier plot of overall survival was constructed by Tumor  
15 Immune Dysfunction and Exclusion (TIDE, <http://tide.dfci.harvard.edu/>) platform in  
16 patients with melanoma (2) stratified by CXCR2 z-scores of RNA-Seq normalized count.  
17 The P value was calculated by testing the association between prediction scores and  
18 overall survival with the two-sided Wald test in a Cox-PH regression (3) (Figure 1D, E).

19

20 **Cell lines**

21 B16F0 (Catalog number: CRL-6322) and B16F10 (Catalog number: CCL-6475, ATCC)  
22 are spontaneous murine melanoma cell lines derived from a C57BL/6J mouse. They are  
23 tumorigenic and metastatic clones, respectively. Melan-A is a nontumorigenic murine cell



24 line that is syngeneic with B16 melanoma lines (Bennett et al., 1987). Normal human  
25 epidermal melanocytes (NHEMs) were purchased from Lonza (#CC-2504) and cultured  
26 in melanocyte growth medium including the MM-4 Bullet kit (Lonza, #CC-2349). To  
27 examine the regulation of CXCL1/CXCR2 signaling in NHEM, these cells were stimulated  
28 with either vehicle, CXCL1 (100ng/ml) or CXCL1+SX692 (5 $\mu$ M) for 24 hours. MelanA and  
29 B16 cells were cultured in DMEM/F12 medium (Gibco, #11330-032) containing 10% FBS  
30 (Sigma, PAA, A11-201). After 5 days of culture, the culture medium was removed, cells  
31 were trypsinized, aspirated, and collected by centrifugation, resuspended in serum  
32 containing medium, and the cell number was determined by Countess II (Invitrogen,  
33 C10228). Simultaneously, aliquots of cells were permeabilized and stained with Pacific  
34 Blue-KI67 and analyzed by flow cytometry. Experiments were conducted in duplicate and  
35 repeated once. Data were statistically analyzed with the Student's t-test. In other  
36 experiments, NHEMs were treated with CXCL1 (100ng/ml) or vehicle, or with SX-682 and  
37 CXCL1 for 24 hours before RNA was extracted and processed for RNAseq analysis. All  
38 cell lines are tested monthly for mycoplasma using a PCR detection system.

39

#### 40 **Mouse studies with the CXCR1/CXCR2 Inhibitor, SX-682**

41 To evaluate the effect of the dual CXCR1/CXCR2 inhibitor SX-682 on tumor growth,  
42 *Braf*<sup>V600E</sup>/*PTEN*<sup>-/-</sup> mice were fed with either SX-682 chow (0.756 g/kg of SX-682, Syntrix  
43 Pharmaceuticals, Inc) or control chow for two weeks prior to tumor induction via topical  
44 administration of 2 $\mu$ l of 5mM 4-HT onto the dorsal skin of 4-week-old mice for three  
45 successive days. The mice continued to be fed on the SX-682 chow or control chow until  
46 tumors grew to a volume of 1.5 cm<sup>3</sup> or required euthanasia due to ulceration or another

47 humane endpoint. *NRas*<sup>Q61R</sup>/*Ink4a*<sup>-/-</sup> mice pups exposed to 4-HT and UV irradiation were  
48 weaned at 21 days and placed on SX-682 or control chow. Tumor volume was measured  
49 by microcalipers and tumor number for each mouse was counted after a period of 5  
50 months.

51 To define the impacts of SX-682 on the peripheral immune populations of non-tumor  
52 bearing mice, 5 wildtype female C57BL/6 mice were treated daily with 50mg/kg SX-682  
53 via oral gavage for 4 days prior to FACS analysis of peripheral immune populations as  
54 described in the flow cytometry methods.

55

## 56 **Evaluation of SX-682 Toxicity**

57 To determine the hematological effects of SX-682, toxicology studies were performed at  
58 the IIT Research Institute (Chicago, IL). This study was conducted in compliance with the  
59 U.S. Food and Drug Administration (FDA) Good Laboratory Practice (GLP) Regulations  
60 (Code of Federal Regulations Title 21 Part 58). SX-682 was administered orally for 28  
61 consecutive days (followed by 14 days of recovery) to male and female CD® IGS rats.  
62 The study consisted of four groups: Group 1, vehicle control (19 rats/sex); Group 2, 50  
63 mg/kg/day SX-682 (17 rats/sex); Group 3, 150 mg/kg/day SX-682 (17 rats/sex); and  
64 Group 4, 250 mg/kg/day SX-682 (22 rats/sex). Ten rats/sex/group were necropsied on  
65 Study Day 29 (terminal necropsy) and 5 rats/sex in Groups 1 and 4 were necropsied on  
66 Study Day 43 (recovery necropsy). Rats subjected to plasma drug level and toxicokinetic  
67 analyses (3 rats/sex in Group 1 and 6 rats/sex in Groups 2-4) were bled at approximately  
68 0.5, 1, 2, 4, 8, and 24 hours after the 1<sup>st</sup> and 28<sup>th</sup> dose.

69

## 70 **Flow cytometry analysis and antibodies**

71 For flow cytometry analyses, tissues were minced on a programmable dissociator and  
72 digested with an enzyme solution of collagenase 1 (1,500 CDU, CAT#234153,  
73 Calbiochem), dispase II (1 mg/mL, CAT#13689500, Roche), and DNase 1 (0.1 mg/mL,  
74 CAT#260913, Calbiochem). The details of staining and flow cytometry analyses protocols  
75 can be found in our previous published methodology (4). Mouse tumors were cut into 1-  
76 to 2-mm slices and digested in buffer containing 2 mg/mL collagenase and 0.1 mg/mL  
77 DNase I. Digested tumors were passed through a 70- $\mu$ m strainer to obtain a single-cell  
78 suspension. Mouse spleens were pressed through 40  $\mu$ m strainer using syringe plunger  
79 to obtain a single-cell suspension. Red blood cells present in whole blood or cell  
80 preparations were removed using ACK Lysing Buffer (CAT#RGF-3015, KD Medical) prior  
81 to the staining. Cells were incubated with Ghost Dye TM Violet 510 (Tonbo Biosciences),  
82 an amine reactive viability dye used to discriminate live/dead cells and washed with FACS  
83 buffer (PBS containing 2% v/v FBS). After blocking Fc receptors with anti-mouse  
84 CD16/CD32 mAb in FACS buffer for 15 minutes, cells were incubated with mAbs  
85 (BioLegend) to mouse CD45-APC/Cy7, CD3-Alexa Fluor 594, CD4-FITC, CD8a-PE,  
86 CD44-APC, CD62L-Alexa Fluor 700, CD25-Percep/Cy5.5, CD69-pacific blue; CD45-Alexa  
87 Fluor 488, CD11b-PE, F4/80-Brilliant violet 421, Ly6C-APC, Ly6G-PE/Cy7, MHC II-Alexa  
88 Fluor 700, CD206-Percep/Cy5.5, etc. 1 hour on ice.

89 For flow cytometric analysis of CXCR2 expression in melanocytes following 4HT  
90 application or tumor formation, single cells were isolated from skins or tumors of mice and  
91 stained with anti-CXCR2 Ab (MAB2164-sp, R&D Systems) at 1:1000 for 2h, followed by

92 secondary antibody application of Alexa Fluor 647-conjugated rabbit anti-rat IgG (#312-  
93 605-003, Jackson ImmunoResearch Lab Inc) at 1:10,000 for 30 min.  
94 Cells were washed twice in FACS buffer and data acquired with FACSCanto II (Becton  
95 Dickenson). For intracellular staining after surface staining, cells were  
96 fixing/permeabilizing using Transcription Factor Buffer Set (Cat:562674, BD Pharmingen)  
97 per manufacture's protocol. FACS data were analyzed using FlowJo software (Version  
98 10.1).

### 99 **Immunohistochemistry**

100 All slides were placed on the Leica Bond-Rx IHC stainer. All steps besides dehydration,  
101 clearing and coverslipping are performed on the Bond-Rx. Slides are deparaffinized prior  
102 to stain specific protocols:

103 CD3: Heat induced antigen retrieval was performed on the Bond Max using their Epitope  
104 Retrieval 2 solution for 5 minutes. Slides were incubated with anti-CD3 (Cat. No# 019-  
105 19741, FujiFilm, Madison, WI) for one hour at a 1:1000 dilution. The Bond Polymer Refine  
106 Red Detection system (cat# DS9390, Leica Biosystems, Deerpark, IL) and DAKO/Agilent  
107 Rabbit-HRP EnVision+ system was used for visualization.

108 CD4: Heat induced antigen retrieval was performed on the Bond Max using their Epitope  
109 Retrieval 2 solution for 20 minutes. Slides were incubated with anti-CD4 (Cat. No.: HS-  
110 360 117, Synaptic Systems GmbH, Goettingen, Germany) for one hour at a 1:1500  
111 dilution and then incubated in a rabbit anti-rat secondary (BA-4001, Vector Laboratories,  
112 Inc.) for 15mins at a 1:2000 dilution. The Bond Polymer Refine Red Detection system  
113 (cat# DS9390, Leica Biosystems, Deerpark, IL) was used for visualization.

114 CD8: Heat induced antigen retrieval was performed on the Bond Max using their Epitope  
115 Retrieval 2 solution for 20 minutes. Slides were incubated with anti-CD8 (Cat HS-361 003,  
116 Synaptic Systems GmbH, Goettingen, Germany) for one hour at a 1:1000 dilution. The  
117 Bond Polymer Refine Red Detection system (cat# DS9390, Leica Biosystems, Deerpark,  
118 IL) was used for visualization.

119 CXCR2: Heat induced antigen retrieval was performed on the Bond Max using their  
120 Epitope Retrieval 2 solution for 20 minutes. Slides were incubated with anti-CXCR2/IL-8  
121 (Catalog #MAB2164, R&D Systems, Minneapolis, MN) for one hour at a 1:200 dilution  
122 and followed by a biotinylated anti-rat (Cat.# AI-4001-.5, Vector Laboratories, Inc.,  
123 Burlingame, CA) for 15 minutes at a 1:2000 dilution. The Bond Polymer Refine detection  
124 system was used for visualization.

125 S100: . Heat induced antigen retrieval was performed on the Bond Max using their  
126 Epitope Retrieval 2 solution for 20 minutes. Slides were placed in a Protein Block (Ref#  
127 x0909, DAKO, Carpinteria, CA) for 10 minutes. The sections were incubated with anti-  
128 S100 (GA50461-2, Agilent(DAKO), Santa Clara, CA) at a dilution of 1:6000 for 60 minutes.  
129 The Bond Polymer Refine Red Detection system (cat# DS9390, Leica Biosystems,  
130 Deerpark, IL) was used for visualization.

131 SOX10: Heat induced antigen retrieval was performed on the Bond Max using their  
132 Epitope Retrieval 2 solution for 10 minutes. Slides were incubated with anti-SOX10  
133 (Catalog #104225-1-AP, Proteintech Group, Inc., Rosemont, IL) for one hour at a 1:1250  
134 dilution. The Bond Polymer Refine Red Detection system (cat#DS9390, Leica Biosystems,  
135 Newcastle Upon Tyne, United Kingdom) was used for visualization.

136 CXCR2-SOX10 Co-Staining: Heat induced antigen retrieval was performed on the Bond  
137 Max using their Epitope Retrieval 2 solution for 20 minutes. Slides were incubated with  
138 anti-CXCR2/IL-8 (Catalog #MAB2164, R&D Systems, Minneapolis, MN) for one hour at  
139 a 1:200 dilution and followed by a biotinylated anti-rat (Cat.# AI-4001-.5, Vector  
140 Laboratories, Inc., Burlingame, CA) for 15 minutes at a 1:2000 dilution. The Bond Refine  
141 (DS9800, Buffalo Grove, IL, USA) detection system was used for visualization. The  
142 sections were then incubated with anti-SOX10 (Catalog #104225-1-AP, Proteintech  
143 Group, Inc., Rosemont, IL) for one hour at a 1:1250 dilution. The Bond Polymer Refine  
144 Red Detection system (cat#DS9390, Leica Biosystems, Newcastle Upon Tyne, United  
145 Kingdom) was used for visualization.

146 Iba1: Heat induced antigen retrieval was performed on the Bond Max using their Epitope  
147 Retrieval 2 solution for 5 minutes. Slides were incubated with anti-Iba1 (Cat. No# 019-  
148 19741, FujiFilm, Madison, WI) for one hour at a 1:1000 dilution. The Bond Polymer Refine  
149 Red Detection system (cat# DS9390, Leica Biosystems, Deerpark, IL) used for  
150 visualization.

151 All slides were then dehydrated, cleared, and coverslipped.

## 152 **Cytokine Array**

153 Tumor lysate or supernatant of cultured cells were prepared as previously described  
154 (Yang et al., 2021). For cultured cell lines,  $3 \times 10^5$  cells were plated per well into 6-well  
155 plates and incubated overnight. Cells were then treated for 24 hours with 5 $\mu$ M SX-682  
156 (Syntrix) or DMSO prior to supernatant collection. Supernatants were centrifuged to  
157 remove cell debris prior to analysis, and both tumor lysates and cell supernatant were  
158 subjected to analysis with the Raybio Mouse Cytokine Antibody Array G-Series 3 (Cat#

159 AAM-CYT-G3-8, RayBiotech) per manufacturer's protocol. The glass chip was scanned  
160 on the Cy3 channel of a GenoPix 4000B scanner (Genopix 6.1, Molecular Devices,  
161 Sunnyvale, CA). For each spot, the net density was determined by subtracting the  
162 background. The relative fold difference in cytokine amount was determined in reference  
163 to the amount present on the control samples.

164

### 165 **RNA extraction and RNAseq analysis**

166 RNA was extracted from tumor tissues or cultured cells using the RNeasy Plus Mini Kit  
167 (Cat#74134, Qiagen) per manufacturer's protocol. RNAseq was performed using an  
168 Illumina next-generation sequencing platform at the Vanderbilt University Medical Center  
169 VANTAGE (Vanderbilt Technologies for Advanced Genomics) Core Facility. Adapters  
170 were trimmed by Cutadapt. After trimming, reads were mapped to the mouse  
171 genome GRCm38.p6 using STAR and quantified by featureCounts. DESeq2 was used  
172 to normalize expression prior to analysis unless otherwise stated. Data were analyzed  
173 using GSEA (4.1.0). Gene sets analyzed include:

174 GOBP\_CD4\_POSITIVE\_ALPHA\_BETA\_T\_CELL\_ACTIVATION, GOBP\_LYMPHOCYTE\_ACTIVATION,  
175 GOBP\_LEUKOCYTE\_PROLIFERATION, GOBP\_LYMPHOCYTE\_ANERGY, GOBP\_IMMUNE\_  
176 RESPONSE, GOBP\_STEM\_CELL\_DIFFERENTIATION, GOBP\_ADAPTIVE\_IMMUNE\_RESPONSE,  
177 GOBP\_STEM\_CELL\_DIVISION, GOBP\_CD8\_POSITIVE\_ALPHA\_BETA\_T\_CELL\_ACTIVATION,  
178 GOBP\_T\_CELL\_MEDIATED\_IMMUNE\_RESPONSE\_TO\_TUMOR\_CELL,  
179 GOBP\_IMMUNE\_RESPONSE\_TO\_TUMOR\_CELL, GOBP\_ANTIGEN\_PROCESSING\_AND\_  
180 PRESENTATION, GOBP\_CD8\_POSITIVE\_ALPHA\_BETA\_T\_CELL\_PROLIFERATION,  
181 GOBP\_T\_CELL\_MEDIATED\_CYTOTOXICITY, GOBP\_CELL\_CYCLE\_PROCESS,  
182 GOBP\_CELL\_CYCLE, GOBP\_CELL\_CYCLE\_G1\_S\_PHASE\_TRANSITION, and  
183 GOBP\_MELANOCYTE\_PROLIFERATION (Human Molecular Signatures Database-MSigDB).

184 For GSEA, 1000 permutations were performed and human orthologs were annotated with  
185 Mouse\_Gene\_Symbol\_Remapping\_Human\_ Orthologs\_MSigDB.v2022.1.Hs.chip.  
186 Phenotype permutation was used except when the sample size per phenotype was less  
187 than 7. In this case, we follow the GSEA recommendation to use gene set permutation.

188 For expression plots, DESeq2 normalized counts were transformed by adding one to the  
189 value (to retain 0s) and then taking the natural log to account for variance. Comparisons  
190 were made using a Mann-Whitney test where appropriate.

191 For murine microenvironment cell population counter (mMCPcounter) analysis, each  
192 count file of protein coding genes was normalized to transcripts per million (TPM) as  
193 recommended by the program. TPM was calculated by determining rate as the raw counts  
194 divided by the gene length, and then dividing each rate by the sum of all rates multiplied  
195 by 1e6. Following TPM normalization, data were transformed utilizing  $\log_2(\text{TPM}$   
196  $\text{normalized expression} + 1)$ . The mMCPcounter (v1.1.0) package was installed and the  
197 function mMCPcounter.estimate was used to determine predicted immune cell infiltrate.

### 198 **Weighted gene co-expression network analysis (WGCNA)**

199 WGCNA (5) was performed on log-transformed, normalized RNA-seq data of 16382  
200 genes from 15 mouse tumor samples (n = 7 WT mice and n = 8 KO mice) using the R  
201 package "WGCNA." A signed network was generated, such that only positively correlated  
202 genes were grouped into modules (negative correlations are given a score of 0), as  
203 follows. The function pickSoftThreshold was used to determine the exponent of the  
204 correlation coefficients matrix which, when used as weights of network connections, best  
205 produces a scale-free network. A power value of 20 was chosen. A topological overlap  
206 matrix of network adjacencies between genes was then generated with the adjacency



207 and TOMsimilarity functions, using the Pearson correlation function, which gave a  
208 distance measure to be used with average-linkage hierarchical clustering. The WGCNA  
209 function cutTreeDynamic was used, with minimum module size of 100, deepSplit = 2, and  
210 pamRespectsDendro = FALSE, to generate modules of co-expressed genes.  
211 Differentially expressed gene modules across WT and KO conditions were determined  
212 using an ANOVA statistical test with FDR correction using the python function selectFDR  
213 from the Sci-Kit Learn package. Six gene modules could significantly distinguish between  
214 the WT and KO tumors (FDR-adjusted p-value < 0.05) (6).

215

### 216 **Identification of Transcription Factor Network Structure**

217 To determine the most important transcription factors (TFs) that both distinguish WT and  
218 KO conditions and were central to a gene module, we calculated the module membership  
219 value, or kME, for each TF, a measure of correlation of its gene expression with the  
220 module eigengene from WGCNA. TFs were filtered to those with a significant FDR-  
221 adjusted p-value for the ANOVA between WT and KO (< 0.05). We then chose the top  
222 40 significant TFs by kME for each of the six significant gene modules to find the most  
223 central TFs for each module.

224

### 225 **Epigenome mapping by ChIPmentation for TCPF21**

226 ChIPmentation was performed as previously described (7,8) with some modifications.  
227 Cells were treated with 5 $\mu$ M SX-682 or DMSO vehicle for 24 hours, collected by  
228 trypsinization, and resuspended in PBS. Next, cells were fixed with fresh formaldehyde  
229 at final concentration of 1% for 10 min at room temperature. Glycine was added to final

230 concentration of 0.125 M to quench the reaction. Cells were resuspended at  $1 \times 10^7$ /ml in  
231 sonication buffer (10 mM Tris-HCl pH 8.0, 2 mM EDTA pH 8.0, 1% SDS, with Protease  
232 Inhibitor Cocktail (Roche) and PhosSTOP™ Phosphatase Inhibitor Cocktail (Roche) and  
233 sonicated for 25-30 sec with Diagenode One sonicator in a 50 ul Bioruptor® One  
234 Microfluidic Chip till most DNA fragments were in the range of 200 to 700 bp. After  
235 sonication, the lysate was adjusted to RIPA buffer conditions (10 mM Tris-HCl pH 8.0, 1  
236 mM EDTA pH 8.0, 140 mM NaCl, 1% Triton X-100, 0.1% SDS, 0.1% sodium deoxycholate,  
237 with Protease Inhibitor Cocktail and PhosSTOP™ Phosphatase Inhibitor Cocktail). For  
238 each immunoprecipitation, lysate from  $2 \times 10^6$  cells and 6 µg of anti-TFCP2L1 antibody  
239 (Boster Bio) were used. 6.0 µg of normal rabbit IgG was used as a control. 40µl  
240 Dynabeads™ Protein A (Invitrogen) were used in each immunoprecipitation. After  
241 immunoprecipitation, beads were washed twice with RIPA low-salt buffer, twice with RIPA  
242 high-salt buffer, twice RIPA lithium-chloride buffer, and once with 10 mM Tris-HCl buffer  
243 (pH 8.0). Illumina sequencing adapters were added on bead-bound DNA fragments via  
244 tagmentation by using Illumina Tagment DNA TDE1 Enzyme and Buffer Kits (Illumina).  
245 After tagmentation, bead-bound DNA fragments were extracted by reversing the crosslink  
246 and proteinase K digestion. DNA fragments were purified with AMPure XP beads  
247 (Beckman Coulter). qPCR was performed first with KAPA HiFi HotStart Ready Mix and a  
248 pair of Nextera custom primers to determine the optimum number of PCR cycles for the  
249 DNA library preparation for each immunoprecipitation. The final enriched DNA library for  
250 each immunoprecipitation was created by PCR with KAPA HiFi HotStart Ready Mix and  
251 Nextera custom primers using the optimum number of PCR cycles determined by qPCR.  
252 The enriched DNA library was purified with AMPure XP beads, and size-selection was

253 performed by controlling the concentration of ethanol in the AMPure XP beads and DNA  
254 mixture. Acquired DNA libraries were sequenced by the Illumina NovaSeq 6000 platform  
255 at Vanderbilt Technologies for Advanced Genomics core laboratory. ChIPmentation  
256 reads were aligned to the mouse reference genome mm10 using Bowtie2 (9). Peaks for  
257 each sample were called by MACS2 with an FDR cutoff of 0.01 and the corresponding  
258 IgG input as the control (10-12). Peaks were annotated using Homer  
259 (<http://homer.ucsd.edu/homer/>) and assigned to their closest genes. Enriched motifs were  
260 identified by the Homer command findMotifsGenome with the default region size and the  
261 motif length (-size 200 and -len 8, 10, 12). Genes that had TFCEP2L1 bound to their 5'  
262 promoter in the DMSO and SX-682-treated samples were selected and analyzed further  
263 using Metascape software (13). Comparisons were made among RPPA, RNAseq, and  
264 ChIPseq data sets for B16F0 cells using Metascape software to identify commonly  
265 enriched pathways.

266

## 267 **RT-qPCR**

268 B16F0, B16F10, and MelanA cells were treated with 5 $\mu$ M SX-682 or DMSO for 12 hours  
269 prior to collection and RNA extraction with Trizol. cDNA was generated using a Reverse  
270 Transcription kit (Catalog number M510A, Promega), and qPCR was performed using a  
271 BioRad CFX-qPCR instrument and SsoAdvanced Universal SYBR Green Supermix (Cat:  
272 172-5270, BioRad). Fold changes were calculated using the formula  $2^{-(\Delta\Delta Ct)}$ , where  
273  $\Delta\Delta Ct = \Delta Ct^{(SX-682)} - \Delta Ct^{(DMSO)}$ . The Ct is the cycle at which the threshold line is crossed.  
274 Primers for  $\beta$ -actin, sense-ACATGGCATCATCACCAACTG and antisense-  
275 AGAATCCAACACGATGCCGG. TFCEP2L1, sense-ACACTACAACCAGCACAACCTC and

276 antisense-TGGTACTCTGTG TACTGCAGC. Sox10, sense-  
277 ACCTATCAGAGGTGGAGCTGAG and antisense-TGC TGTTCCCTTCTTGACCTTG.  
278 MITF, sense-AGAGCAGCAGTTCTGCAGAGC and antisense-  
279 ATGGCTGGTGTCTGACTCACG. Nanog, sense-TCTGCTACTGAGATG CTCTGC and  
280 antisense-ACAGTCCGCATCTTCTGCTTC. FoxD3, sense-AGCGATA  
281 TGCCGGCCAGACG and antisense-TGAGACTGGCCGTGATGAGCG. Notch1, sense-  
282 TGACTGTACTGAGAGCTCCTG and antisense-AAGTACCATAGCTGTCTTGGC. TLF4,  
283 sense-ATGGCTGTCAGCGACGCTCTG and antisense-TGTTACTGCTGCAAGCTG  
284 CAC. Slc4A1, sense-ACTGGAGAACATAATAGGACAG and antisense-AAGGTCAGG  
285 TAAGATAGATGTG. Esrrb, sense-AGTGCGAGTATATGCTTAATG and antisense-  
286 TGAATTGTCCTCTTGAAGAAG. Sox2, sense-ATGATGGAGACGGAGCTGAAG and  
287 antisense-TTGCTGATCTCCGAGTTGTGC. HMGA2, sense-TGCCACAGAAGCGAGGA  
288 CGCG and antisense-TCCTAGGTCTGCCTCTTGGCC.

289

## 290 **Protein extraction and RPPA analysis**

291 Melan-A, B16F0, and B16F10 cells were seeded at a density of  $3 \times 10^5$  per well in a 6-well  
292 plate overnight prior to 24-hour treatment with  $5 \mu\text{M}$  SX-682. Cells were then lysed in a  
293 buffer containing 1% Triton X-100, 50mM HEPES, pH 7.4, 150mM NaCl, 1mM EGTA,  
294 100mM NaF, 1.5mM  $\text{MgCl}_2$ , 10mM Na pyrophosphate, 1mM  $\text{Na}_3\text{VO}_4$ , 10% glycerol,  
295 and freshly added protease inhibitors (Cat# 05056489001, Roche) and  
296 phosphatase inhibitors (Cat# 04906837001, Roche) in 2mL reinforced tubes (Cat#  
297 P000943-LYSKO-A, Precellys). The homogenization sets at 5000 and goes for 10 sec for  
298 cells and 30 sec for tissue in the Precellys 24 Tissue Homogenizer. Lysates were

299 centrifuged at 14,000rpm, 4°C for 2 minutes, and supernatants were collected. Protein  
300 concentration was adjusted to 1.5mg/mL and samples were stored in sample buffer (40%  
301 glycerol, 8% SDS, 0.25M Tris-HCL, pH 6.8. 10% β-mercaptoethanol is added just before  
302 use.) Samples were stored at -80°C until they were submitted to MD Anderson Cancer  
303 Center for processing and RPPA analysis of 480 proteins.

304 RPPA data were normalized and analyzed after a log<sub>2</sub> transformation. All comparisons  
305 were performed using Welch's t-test. Changes in protein expression were considered  
306 significant based upon two criteria: p-value < 0.05 and a log<sub>2</sub>(fold change) of ±2  
307 (equivalent to a fold change of ±4). Functional protein association networks are presented  
308 using STRING version 11.5.

309

### 310 **Statistical analysis**

311 Data were summarized in figures using either the mean ± standard deviation (SD) for  
312 error bar charts or median with the first and third quartiles for boxplots. The mean of two  
313 groups were compared using Welch's t-test. For a comparison of more than two group  
314 means, the one-way analysis of variance (ANOVA) with post-hoc Tukey's test was used.  
315 The mean difference between two groups by the other factor was assessed in the context  
316 of a two-way ANOVA. Pairwise differences between two groups were compared using  
317 model-based mean comparisons. The Benjamini and Hochberg (BH) was used to adjust p-  
318 value for multiple comparisons as noted in the text to control the within experiment false  
319 discovery rate to less than 5%. Data was analyzed on a natural log scale or rank-based  
320 scales to meet the normality assumptions of statistical tests as needed. Survival curves are  
321 estimated using the Kaplan-Meier method and compared between two groups using

322 the log-rank test. Levels of statistical significance are denoted \* for  $p < 0.05$ , \*\* for  $p < 0.01$ ,  
323 and \*\*\* for  $p < 0.001$ , respectively. The analyses were performed using R version 4.1.2 or  
324 GraphPad Prism software. WGCNA statistical analysis was performed as described in  
325 the WGCNA methods.

326

### 327 **References for Supplementary Methods:**

328 1. Yan C and Richmond A. (2021). Hiding in the dark: pan-cancer characterization of  
329 expression and clinical relevance of CD40 to immune checkpoint blockade therapy. *Mol*  
330 *Cancer* 20: 146, 10.1186/s12943-021-01442-3

331 2. Fu J, Li K, Zhang W, Wan C, Zhang J, Jiang P, Liu XS. (2020). Large-scale public data  
332 reuse to model immunotherapy response and resistance. *Genome Med* 12:21  
333 10.1186/s13073-020-0721-z.

334 3. Jiang P, Gu S, Pan D, Fu J, Sahu A, Hu X, Li Z, Traugh N, Bu X, Li B, et al: (2018).  
335 Signatures of T cell dysfunction and exclusion predict cancer immunotherapy  
336 response. *Nat Med* 24:1550-1558. 10.1038/s41591-018-0136-1.

337 4. Yang, J., Yan, C., Vilgelm, A.E., Chen, S.C., Ayers, G.D., Johnson, C.A., and  
338 Richmond, A. (2021). Targeted Deletion of CXCR2 in Myeloid Cells Alters the Tumor  
339 Immune Environment to Improve Antitumor Immunity. *Cancer Immunol Res* 9, 200-213.  
340 10.1158/2326-6066.CIR-20-0312.

341 5. Langfelder P and Horvath S (2008). WGCNA: an R package for weighted correlation  
342 network analysis. *BMC Bioinformatics*. 9:559. 10.1186/1471-2105-9-559

343 6. Wooten DJ, Groves SM, Tyson DR, Liu Q, Lim JS, Albert R, Lopez CF, Sage J,  
344 Quaranta V. 2019. Systems-level network modeling of Small Cell Lung Cancer subtypes  
345 identifies master regulators and destabilizers. *Plos Comput Biol* 15: e1007343.  
346 <https://journals.plos.org/ploscompbiol/article?id=10.1371/journal.pcbi.1007343>.

347 7. Xu W, Ye Y, Sharrocks AD, Zhang W, Chen X (2020). Genome-wide interrogation of  
348 protein-DNA interactions in mammalian cells using ChIPmentation. *STAR Protoc*.  
349 1(3):100187 10.1016/j.xpro.2020.100187

350 8. Krausgruber T, Fortelny N, Fife-Gernedl V, Senekowitsch M, Schuster LC, Lercher A,  
351 Nemc A, Schmidl C, Rendeiro AF, Bergthaler A, and Bock C. (2020) Structural cells are  
352 key regulators of organ-specific immune responses. *Nature*. 583(7815):296-302.  
353 10.1038/s41586-020-2424-4.

354 9. Langmead, B. and Salzberg, S.L. Fast gapped-read alignment with Bowtie 2. *Nat*  
355 *Methods* 2012;9(4):357-359. 10.1038/nmeth.1923.

356 10. Feng, J.Liu T Qin B, Zhang Y, Liu XS (2012). Identifying ChIP-seq enrichment using  
357 MACS. *Nature protocols*7(9):1728-1740. 10.1002/0471250953.bi0214s34.

- 358 11. Feng, J., Liu, T. and Zhang, Y. Using MACS to identify peaks from ChIP-Seq data.  
359 (2011). *Current protocols in bioinformatics*. Chapter 2:Unit 2 14.  
360 10.1002/0471250953.bi0214s34.
- 361 12. Zhang, Y., Liu T, Meyer CA, Eeckhoute J, Johnson DS, Bernstein BE, Nusbaum C,  
362 Meyers RM, Brown M, Li W, Siu S. Model-based analysis of ChIP-Seq (MACS). *Genome*  
363 *biology* 2008;9(9):R137. 10.1186/gb-2008-9-9-r137
- 364 13. Zhou Y, Zhou B, Pache L, Chang M, Khodabakhshi A H, Tanaseichuk O, Benner C,  
365 Chanda SK. (2019). Metascape provides a biologist-oriented resource for the analysis of  
366 systems-level datasets. *Nature Commun.* 10: 1523-1563. 10.1038/s41467-019-09234-6.
